# Supplementary material for: Theoretical study of the mechanism for photocatalytic CO2 reduction to methanol over layered double hydroxides
Source: Royal Society of Chemistry journal article supplement (doi:10.1039/d4ta01556h), 2024-01-01
Supplement: d4ta01556h1.pdf [file d4ta01556h1.pdf]

## **Electronic Supplementary Information of Theoretical study of the mechanism for photocatalytic CO<sub>2</sub> reduction to methanol over layered double hydroxides**

Si-Min Xu,<sup>\*a</sup> Rui Xu,<sup>b</sup> Yu-Quan Zhu,<sup>c</sup> Ling Zhu<sup>a</sup> and Yingtong Zong<sup>\*a</sup>

<sup>a</sup> *College of Chemistry and Chemical Engineering, Gannan Normal University, Ganzhou, 341000, P. R. China. E-mail: xusimin@gnnu.edu.cn (S.-M. Xu), zongyingtong@gnnu.edu.cn (Y. Zong).*

<sup>b</sup> *Jiangxi Intellectual Property Protection Center, Nanchang, 330006, P. R. China.*

<sup>c</sup> *Hubei Key Laboratory of Pollutant Analysis & Reuse Technology, College of Chemistry and Chemical Engineering, Hubei Normal University, Huangshi, 435002, P. R. China.*

## Contents

| Item                    | Title                                                                                                                                  | Page |
|-------------------------|----------------------------------------------------------------------------------------------------------------------------------------|------|
| Notes                   |                                                                                                                                        |      |
| Supplementary Note 1    | Benchmark work on external stress                                                                                                      | 1    |
| Supplementary Note 2    | Benchmark work on work function of Mg <sub>2</sub> Al-NO <sub>3</sub> -LDH                                                             | 2    |
| Supplementary Note 3    | Benchmark work on cutoff energy                                                                                                        | 3    |
| Supplementary Note 4    | Benchmark work on <i>k</i> -point meshes                                                                                               | 4    |
| Supplementary Note 5    | Method to calculate photocatalytic driving force $E_{df}$                                                                              | 5    |
| Figures                 |                                                                                                                                        |      |
| Supplementary Figure 1  | Work functions of Mg <sub>2</sub> Al-NO <sub>3</sub> -LDH with different layers                                                        | 6    |
| Supplementary Figure 2  | Work functions of Mg <sub>2</sub> Al-NO <sub>3</sub> -LDH with one bilayer and vacuum layer with different thickness                   | 7    |
| Supplementary Figure 3  | Main elementary steps in CO <sub>2</sub> reduction to CO, HCOOH, HCHO, CH <sub>3</sub> OH, and CH <sub>4</sub>                         | 8    |
| Supplementary Figure 4  | Band structures of M <sub>2</sub> M'-NO <sub>3</sub> -LDHs                                                                             | 9    |
| Supplementary Figure 5  | Work functions of M <sub>2</sub> M'-NO <sub>3</sub> -LDHs                                                                              | 10   |
| Supplementary Figure 6  | Optimized geometries of CO <sub>2</sub> reduction intermediates over Mg <sub>2</sub> Al-NO <sub>3</sub> -LDH                           | 11   |
| Supplementary Figure 7  | Optimized geometries of CO <sub>2</sub> reduction intermediates over Mg <sub>2</sub> Ga-NO <sub>3</sub> -LDH                           | 12   |
| Supplementary Figure 8  | Optimized geometries of CO <sub>2</sub> reduction intermediates over Co <sub>2</sub> Al-NO <sub>3</sub> -LDH                           | 13   |
| Supplementary Figure 9  | Optimized geometries of CO <sub>2</sub> reduction intermediates over Co <sub>2</sub> Ga-NO <sub>3</sub> -LDH                           | 14   |
| Supplementary Figure 10 | Optimized geometries of CO <sub>2</sub> reduction intermediates over Ni <sub>2</sub> Al-NO <sub>3</sub> -LDH                           | 15   |
| Supplementary Figure 11 | Optimized geometries of CO <sub>2</sub> reduction intermediates over Ni <sub>2</sub> Ga-NO <sub>3</sub> -LDH                           | 16   |
| Supplementary Figure 12 | Optimized geometries of CO <sub>2</sub> reduction intermediates over Zn <sub>2</sub> Al-NO <sub>3</sub> -LDH                           | 17   |
| Supplementary Figure 13 | Optimized geometries of CO <sub>2</sub> reduction intermediates over Zn <sub>2</sub> Ga-NO <sub>3</sub> -LDH                           | 18   |
| Supplementary Figure 14 | $\Delta G$ of elementary steps in CO <sub>2</sub> reduction over Mg <sub>2</sub> Ga-NO <sub>3</sub> -LDH without illumination and pH 0 | 19   |
| Supplementary Figure 15 | $\Delta G$ of elementary steps in CO <sub>2</sub> reduction over Co <sub>2</sub> Al-NO <sub>3</sub> -LDH without illumination and pH 0 | 20   |
| Supplementary Figure 16 | $\Delta G$ of elementary steps in CO <sub>2</sub> reduction over Co <sub>2</sub> Ga-NO <sub>3</sub> -LDH without illumination and pH 0 | 21   |
| Supplementary Figure 17 | $\Delta G$ of elementary steps in CO <sub>2</sub> reduction over Ni <sub>2</sub> Al-NO <sub>3</sub> -LDH without illumination and pH 0 | 22   |
| Supplementary Figure 18 | $\Delta G$ of elementary steps in CO <sub>2</sub> reduction over Ni <sub>2</sub> Ga-NO <sub>3</sub> -LDH without illumination and pH 0 | 23   |
| Supplementary Figure 19 | $\Delta G$ of elementary steps in CO <sub>2</sub> reduction over Zn <sub>2</sub> Al-NO <sub>3</sub> -LDH without illumination and pH 0 | 24   |
| Supplementary Figure 20 | $\Delta G$ of elementary steps in CO <sub>2</sub> reduction over Zn <sub>2</sub> Ga-NO <sub>3</sub> -LDH without illumination and pH 0 | 25   |
| Supplementary Figure 21 | $\Delta G$ of elementary steps in CO <sub>2</sub> reduction over Mg <sub>2</sub> Ga-NO <sub>3</sub> -LDH with illumination and pH 7    | 26   |
| Supplementary Figure 22 | $\Delta G$ of elementary steps in CO <sub>2</sub> reduction over Co <sub>2</sub> Al-NO <sub>3</sub> -LDH with illumination and pH 7    | 27   |
| Supplementary Figure 23 | $\Delta G$ of elementary steps in CO <sub>2</sub> reduction over Co <sub>2</sub> Ga-NO <sub>3</sub> -LDH with illumination and pH 7    | 28   |
| Supplementary Figure 24 | $\Delta G$ of elementary steps in CO <sub>2</sub> reduction over Ni <sub>2</sub> Al-NO <sub>3</sub> -LDH with illumination and pH 7    | 29   |
| Supplementary Figure 25 | $\Delta G$ of elementary steps in CO <sub>2</sub> reduction over Ni <sub>2</sub> Ga-NO <sub>3</sub> -LDH with illumination and pH 7    | 30   |
| Supplementary Figure 26 | $\Delta G$ of elementary steps in CO <sub>2</sub> reduction over Zn <sub>2</sub> Al-NO <sub>3</sub> -LDH with illumination and pH 7    | 31   |
| Supplementary Figure 27 | $\Delta G$ of elementary steps in CO <sub>2</sub> reduction over Zn <sub>2</sub> Ga-NO <sub>3</sub> -LDH with illumination and pH 7    | 32   |
| Supplementary Figure 28 | Gibbs free energy diagrams of the main reaction pathways for                                                                           | 33   |

|                          |                                                                                                                                                                                                                                    |    |
|--------------------------|------------------------------------------------------------------------------------------------------------------------------------------------------------------------------------------------------------------------------------|----|
|                          | photocatalytic CO <sub>2</sub> reduction over Co <sub>2</sub> Al-NO <sub>3</sub> -LDH, Co <sub>2</sub> Ga-NO <sub>3</sub> -LDH, Ni <sub>2</sub> Al-NO <sub>3</sub> -LDH, and Zn <sub>2</sub> Ga-NO <sub>3</sub> -LDH, respectively |    |
| Supplementary Figure 29  | Gibbs free energy diagrams of the main reaction pathways for photocatalytic CO <sub>2</sub> reduction over Zn <sub>2</sub> Al-NO <sub>3</sub> -LDH                                                                                 | 34 |
| Supplementary Figure 30  | Work functions of the (001) surface for (ZnCu) <sub>2</sub> Ga-NO <sub>3</sub> -LDH                                                                                                                                                | 35 |
| Supplementary Figure 31  | ΔG of elementary steps in CO <sub>2</sub> reduction over (ZnCu) <sub>2</sub> Ga-NO <sub>3</sub> -LDH under reaction condition                                                                                                      | 36 |
| Supplementary Figure 32  | ΔG <sub>PDS</sub> for generating CO*, HCOOH*, HCHO*, CH <sub>3</sub> OH*, and CH <sub>4</sub> * under reaction condition                                                                                                           | 37 |
| Tables                   |                                                                                                                                                                                                                                    |    |
| Supplementary Table 1    | Experimental lattice parameters of M <sub>2</sub> M'-NO <sub>3</sub> -LDHs                                                                                                                                                         | 38 |
| Supplementary Table 2    | Energies of CO <sub>2</sub> reduction intermediates at different adsorption sites of Mg <sub>2</sub> Al-NO <sub>3</sub> -LDH                                                                                                       | 39 |
| Supplementary Table 3    | Energies of CO <sub>2</sub> reduction intermediates at different adsorption sites of Mg <sub>2</sub> Ga-NO <sub>3</sub> -LDH                                                                                                       | 40 |
| Supplementary Table 4    | Energies of CO <sub>2</sub> reduction intermediates at different adsorption sites of Co <sub>2</sub> Al-NO <sub>3</sub> -LDH                                                                                                       | 41 |
| Supplementary Table 5    | Energies of CO <sub>2</sub> reduction intermediates at different adsorption sites of Co <sub>2</sub> Ga-NO <sub>3</sub> -LDH                                                                                                       | 42 |
| Supplementary Table 6    | Energies of CO <sub>2</sub> reduction intermediates at different adsorption sites of Ni <sub>2</sub> Al-NO <sub>3</sub> -LDH                                                                                                       | 43 |
| Supplementary Table 7    | Energies of CO <sub>2</sub> reduction intermediates at different adsorption sites of Ni <sub>2</sub> Ga-NO <sub>3</sub> -LDH                                                                                                       | 44 |
| Supplementary Table 8    | Energies of CO <sub>2</sub> reduction intermediates at different adsorption sites of Zn <sub>2</sub> Al-NO <sub>3</sub> -LDH                                                                                                       | 45 |
| Supplementary Table 9    | Energies of CO <sub>2</sub> reduction intermediates at different adsorption sites of Zn <sub>2</sub> Ga-NO <sub>3</sub> -LDH                                                                                                       | 46 |
| Supplementary Table 10   | Energies of CO <sub>2</sub> reduction intermediates at different adsorption sites of (ZnCu) <sub>2</sub> Ga-NO <sub>3</sub> -LDH                                                                                                   | 47 |
| References               |                                                                                                                                                                                                                                    |    |
| Supplementary References |                                                                                                                                                                                                                                    | 48 |

## Notes

### Note 1

In our previous work, we have found that the lattice parameters of LDHs are influenced by the external stress set during geometry optimization (*J. Mater. Chem. A*, 2021, **9**, 20466–20482). In general, the lattice parameters  $a$ ,  $b$ , and  $c$  decrease with the increasing external stress. In this work, a benchmark test of external stress was performed on  $\text{Mg}_2\text{Al-NO}_3\text{-LDH}$ .  $\text{Mg}_2\text{Al-NO}_3\text{-LDH}$  was optimized under the external stress of 0.1 – 10.0 GPa with a step length of 0.1 GPa. The lattice parameters  $c$ , which is more sensitive to external stress than  $a$  and  $b$ , matches well with the experimental value under the external stress of 3.8 GPa (*Catal. Today*, 1991, **11**, 173–301). Therefore, the external stress of 3.8 GPa is applied in this work.

## Note 2

In order to obtain an accurate work function of  $M_2M'-NO_3$ -LDH, the number of bilayers for LDHs and thickness of vacuum layer need to be properly set. Firstly, we performed benchmark calculations on the number of bilayers for  $Mg_2Al-NO_3$ -LDH. The vacuum layer was set to be 120 Å. The values of work functions for  $Mg_2Al-NO_3$ -LDH with different bilayers were calculated to be 4.738, 4.682, 4.679, 4.850, 4.811, and 4.721 eV for one, two, three, four, five, and six bilayers, respectively, as shown in Fig. S1. The work function of  $Mg_2Al-NO_3$ -LDH with only one bilayer (4.738 eV) is close to that with six bilayers (4.721 eV). This result is different from that for metal or metal oxide. Although this result is surprising at first impression, but can be well understood. Unlike metal or metal oxide binding with metal bond or covalent bond, the interaction between LDH matrix and interlayer guest is mainly Coulomb force, and van der Waals force, which is much weaker than covalent bond. Thus the electronic structure of LDH matrix is not severely influenced by the interaction between LDH bilayers. Therefore, the work function of LDH can be well represented by LDH with one bilayer.

On the other hand, we calculated the work functions of  $Mg_2Al-NO_3$ -LDH (003) surface (one bilayer) with the thickness of vacuum layer ranging from 20 to 160 Å. As is shown in Fig. S2, the work function of  $Mg_2Al-NO_3$ -LDH (003) surface is not converged when the thickness of vacuum layer is smaller than 70 Å. The work function of  $Mg_2Al-NO_3$ -LDH (003) surface with the thickness of vacuum layer of 70 Å is only 0.034 eV larger than that with a vacuum layer as thick as 120 Å. Therefore, a vacuum layer with the thickness of 70 Å is sufficient for accurately calculating the work function of LDH (003) surface.

**Note 3**

In order to determine the cutoff energy employed in this work, the cutoff energies of both 400 eV and 600 eV were applied to calculate the Gibbs free energy changes ( $\Delta G$ ) of elementary steps in CO<sub>2</sub> reduction over Mg<sub>2</sub>Al-NO<sub>3</sub>-LDH. The average absolute value of deviation between  $\Delta G$  obtained by 400 eV and that by 600 eV was calculated to be 0.09 eV, which is smaller than 0.1 eV. Therefore, we believe that a cutoff energy of 400 eV is accurate enough and cost-effective.

**Note 4**

In order to determine the *k*-point meshes employed in this work, the *k*-point meshes of both  $3 \times 3 \times 1$  and  $5 \times 5 \times 1$  were applied to calculate the Gibbs free energy changes ( $\Delta G$ ) of elementary steps in  $\text{CO}_2$  reduction over  $\text{Mg}_2\text{Al-NO}_3\text{-LDH}$ . The average absolute value of deviation between  $\Delta G$  obtained by  $3 \times 3 \times 1$  and that by  $5 \times 5 \times 1$  was calculated to be 0.09 eV, which is smaller than 0.1 eV. Therefore, we believe that a *k*-point meshes of  $3 \times 3 \times 1$  is accurate enough and cost-effective.

### Note 5

The photocatalytic driving force  $E_{df}$  is identified as the difference between the  $\Delta G$  in the condition of standard hydrogen electrode ( $\Delta G_{SHE}$ ) and the  $\Delta G$  under reaction condition ( $\Delta G_{Reaction}$ ), i.e.,  $E_{df} = \Delta G_{SHE} - \Delta G_{Reaction}$ . Then, the following equation can be obtained:

$$\begin{aligned} E_{df} &= \Delta G_{SHE} - \Delta G_{Reaction} \\ &= (G_{\text{product in the condition of SHE}} - G_{\text{reactant in the condition of SHE}}) - (G_{\text{product in reaction condition}} - G_{\text{reactant in reaction condition}}) \end{aligned}$$

Given that only the Gibbs free energies of  $H^+$  and  $e^-$  are different in the condition of standard hydrogen electrode and in reaction condition, the equation can be simplified as follows:

$$\begin{aligned} E_{df} &= G_{(H^+ + e^-) \text{ in reaction condition}} - G_{(H^+ + e^-) \text{ in the condition of SHE}} \\ &= (G_{H^+ \text{ in reaction condition}} - G_{H^+ \text{ in the condition of SHE}}) + (G_{e^- \text{ in reaction condition}} - G_{e^- \text{ in the condition of SHE}}) \\ &= (G_{H^+ \text{ in pH7}} - G_{H^+ \text{ in pH0}}) + (G_{e^- \text{ in CBM}} - (-4.5 \text{ eV})) \\ &= -kT \ln 10 \Delta \text{pH} + E_{CBM} + 4.5 \text{ eV} \\ &= E_{CBM} + 4.09 \text{ eV} \end{aligned}$$



## Figures

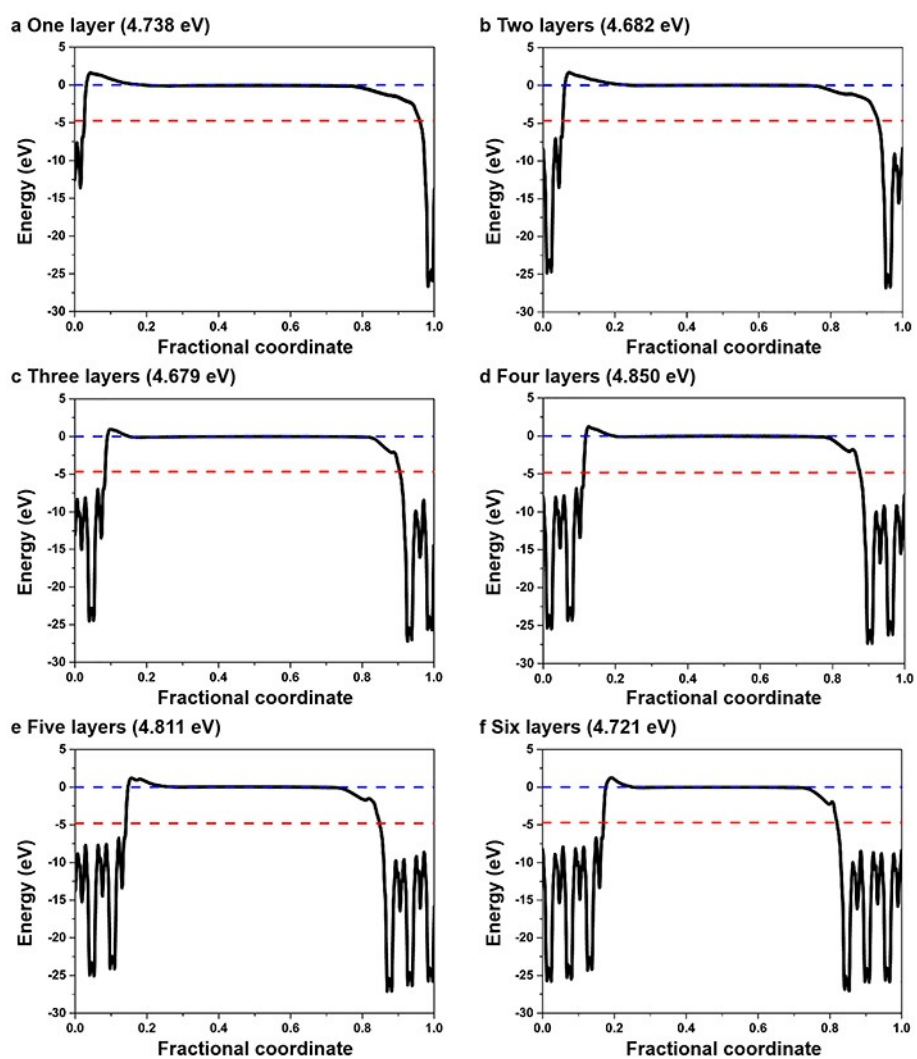

**Fig. S1** Work functions of the (001) surfaces for Mg<sub>2</sub>Al-NO<sub>3</sub>-LDH with (a) one layer, (b) two layers, (c) three layers, (d) four layers, (e) five layers, and (f) six layers, respectively. Vacuum level (set as zero point) and Fermi level are labeled with dashed blue line and red line, respectively. Value of the work function is listed in the bracket.

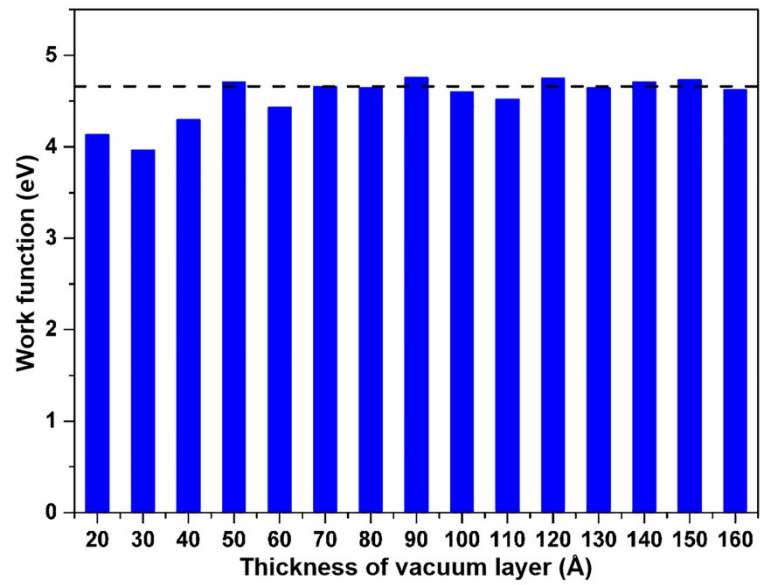

**Fig. S2** Work functions of Mg<sub>2</sub>Al-NO<sub>3</sub>-LDH with one bilayer and vacuum layer with different thickness.

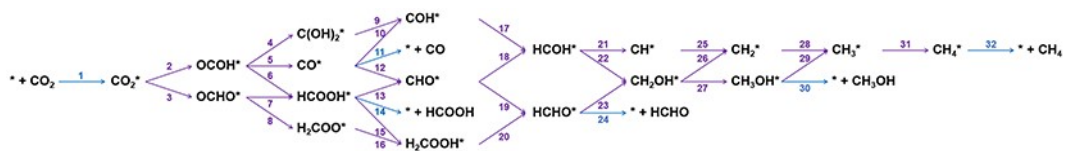

**Fig. S3** Main elementary steps in CO<sub>2</sub> reduction to CO, HCOOH, HCHO, CH<sub>3</sub>OH, and CH<sub>4</sub>. Blue arrows represent adsorption and desorption steps and purple arrows represent reduction steps.

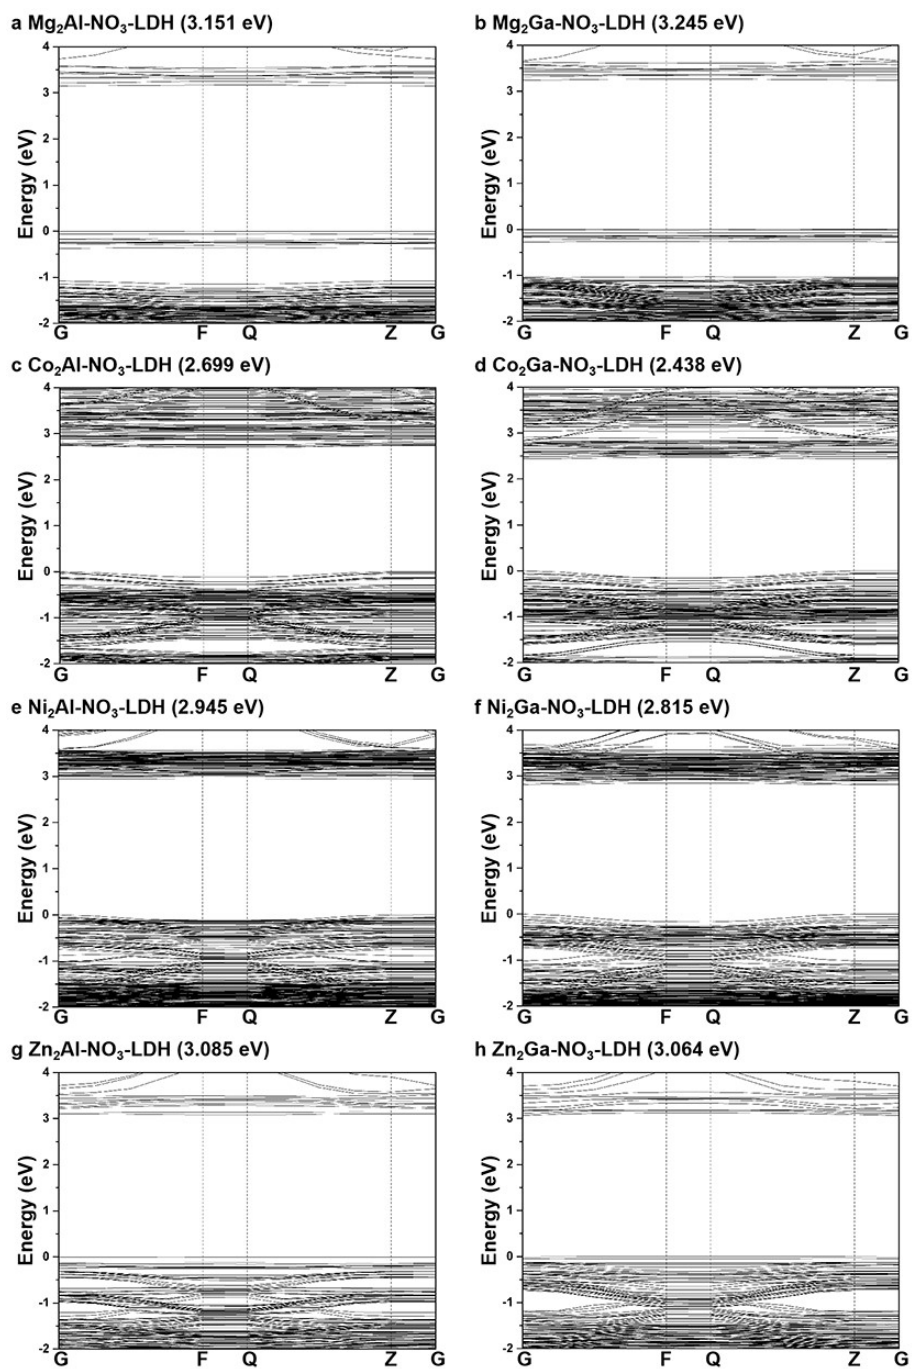

**Fig. S4** Band structures of (a)  $\text{Mg}_2\text{Al-NO}_3\text{-LDH}$ , (b)  $\text{Mg}_2\text{Ga-NO}_3\text{-LDH}$ , (c)  $\text{Co}_2\text{Al-NO}_3\text{-LDH}$ , (d)  $\text{Co}_2\text{Ga-NO}_3\text{-LDH}$ , (e)  $\text{Ni}_2\text{Al-NO}_3\text{-LDH}$ , (f)  $\text{Ni}_2\text{Ga-NO}_3\text{-LDH}$ , (g)  $\text{Zn}_2\text{Al-NO}_3\text{-LDH}$ , and (h)  $\text{Zn}_2\text{Ga-NO}_3\text{-LDH}$ . The band gap energy of each  $\text{M}_2\text{M}'\text{-NO}_3\text{-LDH}$  is listed in the bracket.

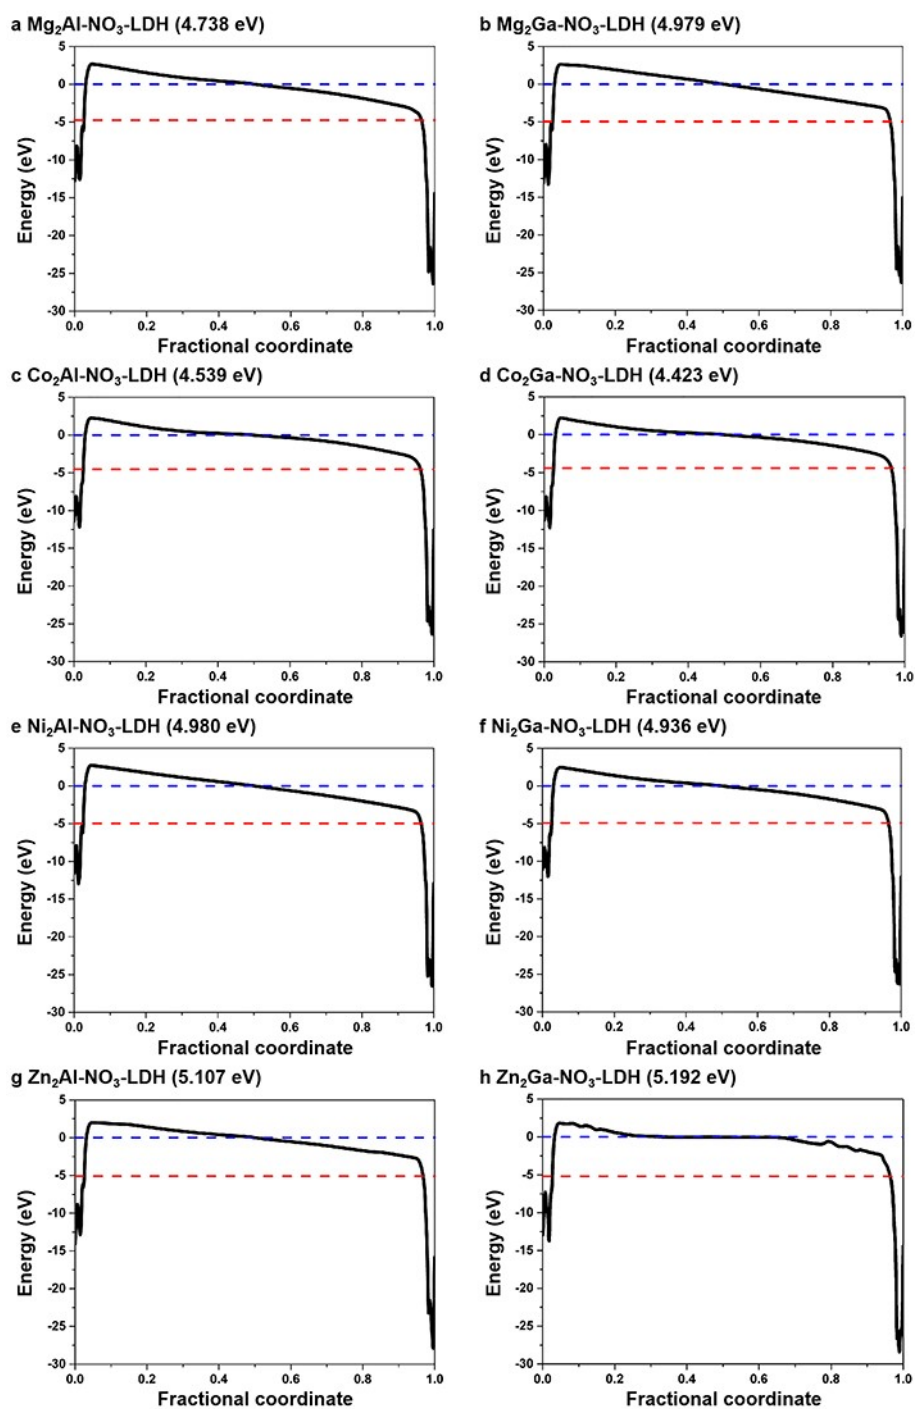

**Fig. S5** Work functions of the (001) surfaces for (a)  $\text{Mg}_2\text{Al-NO}_3\text{-LDH}$ , (b)  $\text{Mg}_2\text{Ga-NO}_3\text{-LDH}$ , (c)  $\text{Co}_2\text{Al-NO}_3\text{-LDH}$ , (d)  $\text{Co}_2\text{Ga-NO}_3\text{-LDH}$ , (e)  $\text{Ni}_2\text{Al-NO}_3\text{-LDH}$ , (f)  $\text{Ni}_2\text{Ga-NO}_3\text{-LDH}$ , (g)  $\text{Zn}_2\text{Al-NO}_3\text{-LDH}$ , and (h)  $\text{Zn}_2\text{Ga-NO}_3\text{-LDH}$ , respectively. Vacuum level (set as zero point) and Fermi level are labeled with dashed blue line and red line, respectively. Value of the work function is listed in the bracket.

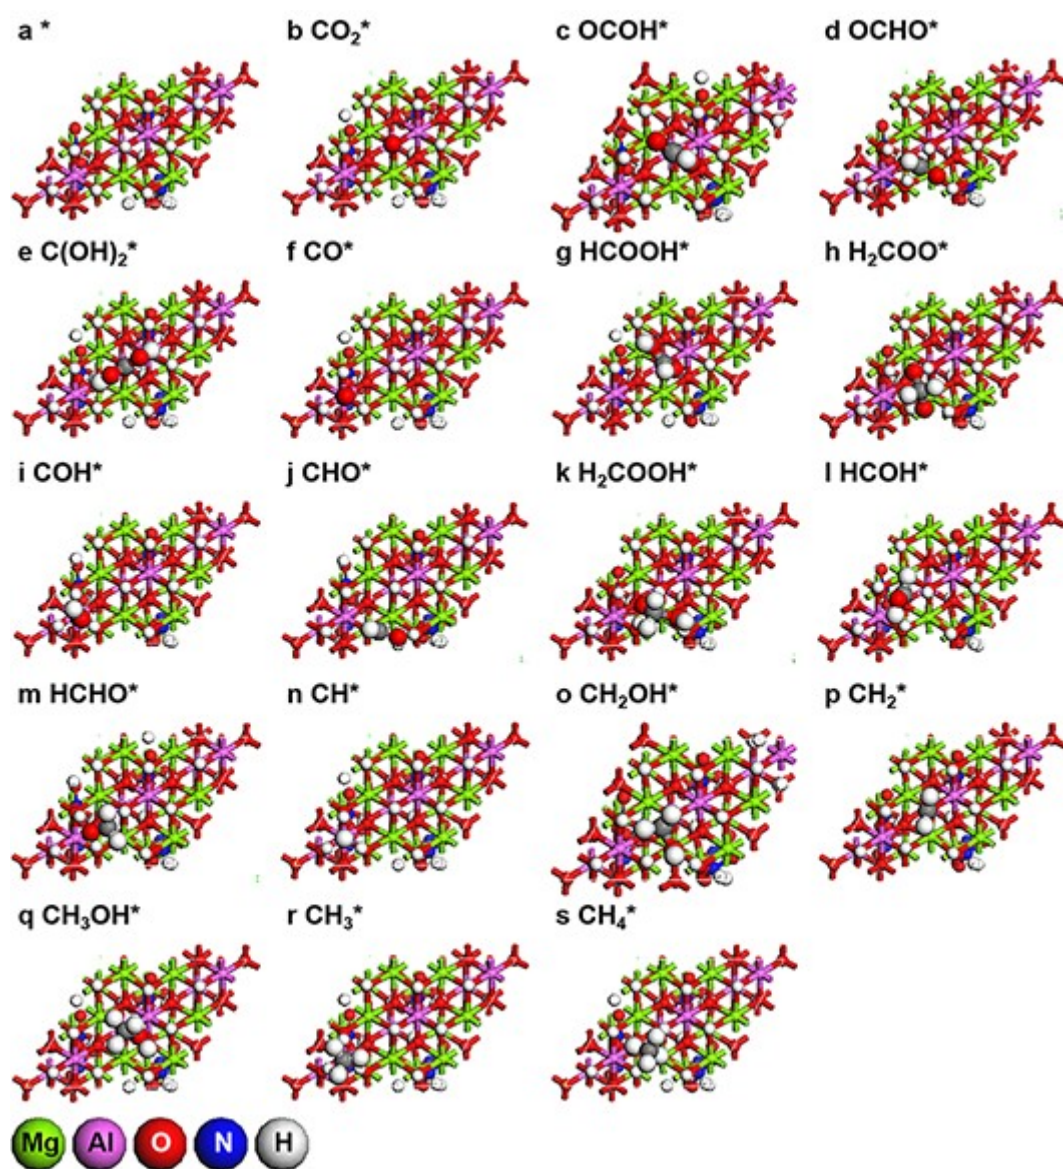

**Fig. S6** Optimized geometries of reaction intermediates during CO<sub>2</sub> reduction over Mg<sub>2</sub>Al-NO<sub>3</sub>-LDH: (a) \*, (b) CO<sub>2</sub>\*, (c) OCOH\*, (d) OCHO\*, (e) C(OH)<sub>2</sub>\*, (f) CO\*, (g) HCOOH\*, (h) H<sub>2</sub>COO\*, (i) COH\*, (j) CHO\*, (k) H<sub>2</sub>COOH\*, (l) HCOH\*, (m) HCHO\*, (n) CH\*, (o) CH<sub>2</sub>OH\*, (p) CH<sub>2</sub>\*, (q) CH<sub>3</sub>OH\*, (r) CH<sub>3</sub>\*, and (s) CH<sub>4</sub>\*, respectively. The color code of each element is displayed on the bottom.

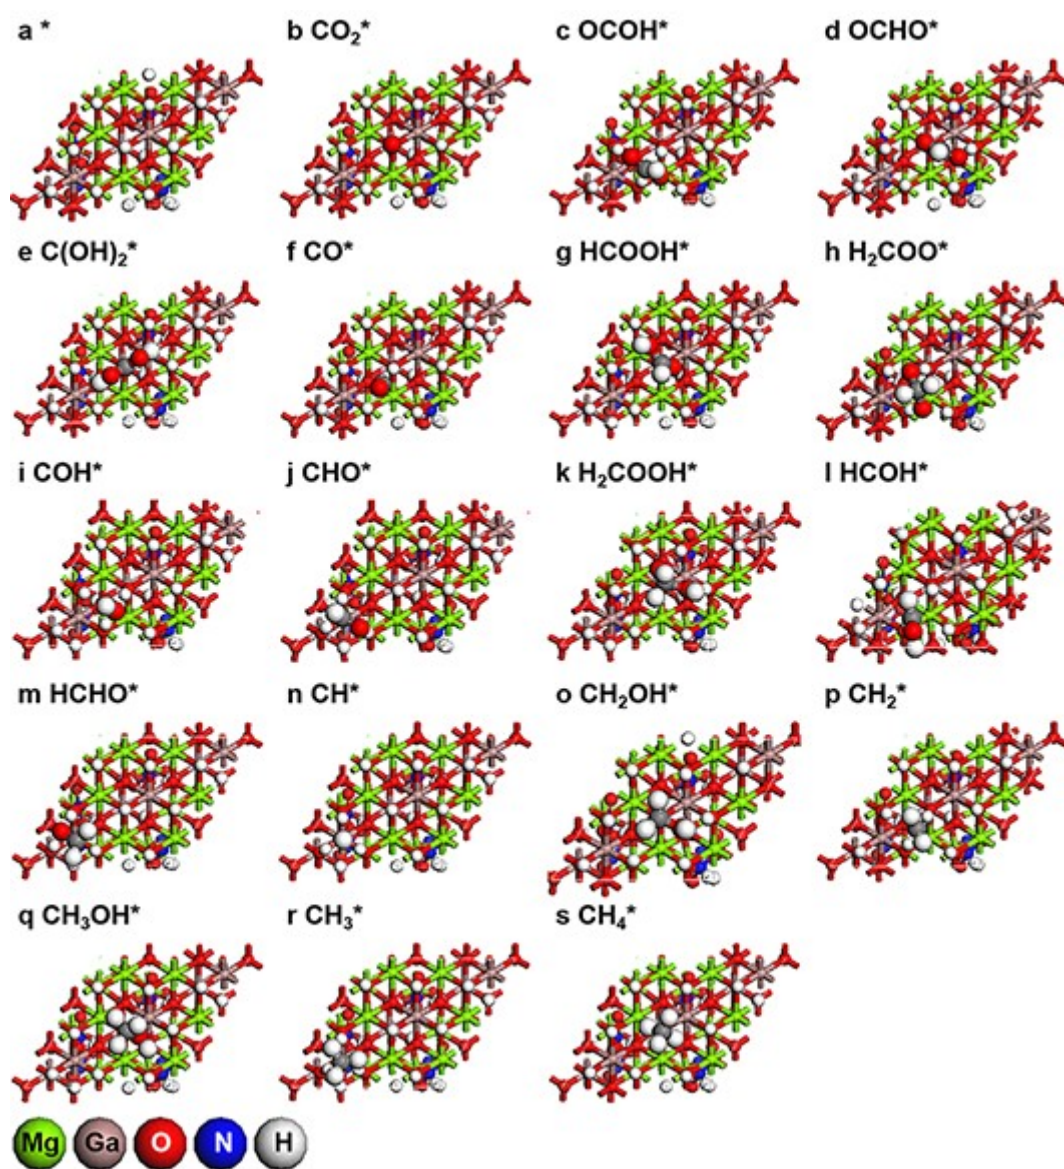

**Fig. S7** Optimized geometries of reaction intermediates during CO<sub>2</sub> reduction over Mg<sub>2</sub>Ga-NO<sub>3</sub>-LDH: (a) \*, (b) CO<sub>2</sub>\*, (c) OCOH\*, (d) OCHO\*, (e) C(OH)<sub>2</sub>\*, (f) CO\*, (g) HCOOH\*, (h) H<sub>2</sub>COO\*, (i) COH\*, (j) CHO\*, (k) H<sub>2</sub>COOH\*, (l) HCOH\*, (m) HCHO\*, (n) CH\*, (o) CH<sub>2</sub>OH\*, (p) CH<sub>2</sub>\*, (q) CH<sub>3</sub>OH\*, (r) CH<sub>3</sub>\*, and (s) CH<sub>4</sub>\*, respectively. The color code of each element is displayed on the bottom.

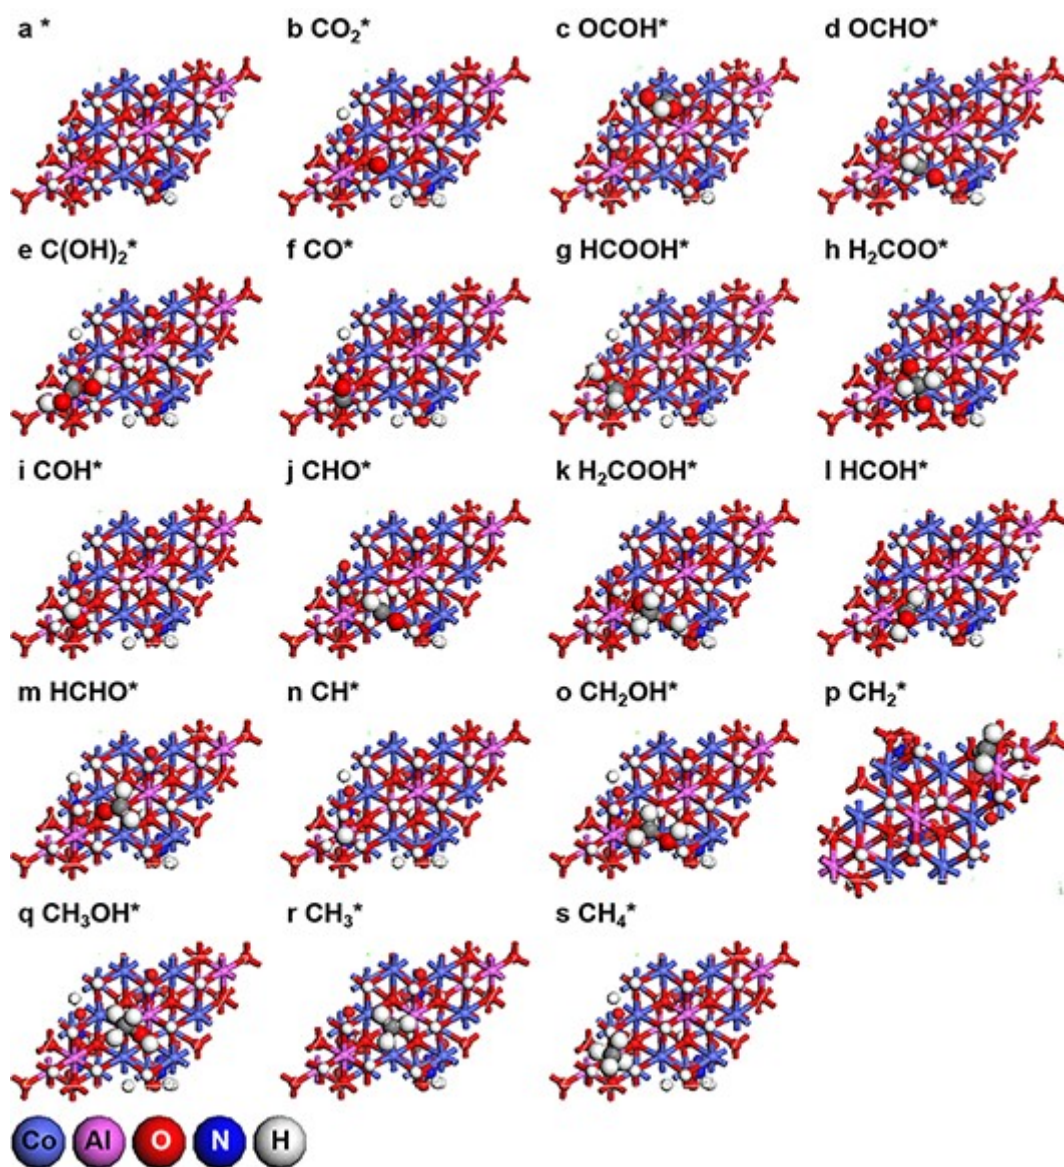

**Fig. S8** Optimized geometries of reaction intermediates during CO<sub>2</sub> reduction over Co<sub>2</sub>Al-NO<sub>3</sub>-LDH: (a)  $^*$ , (b) CO<sub>2</sub><sup>\*</sup>, (c) OCOH<sup>\*</sup>, (d) OCHO<sup>\*</sup>, (e) C(OH)<sub>2</sub><sup>\*</sup>, (f) CO<sup>\*</sup>, (g) HCOOH<sup>\*</sup>, (h) H<sub>2</sub>COO<sup>\*</sup>, (i) COH<sup>\*</sup>, (j) CHO<sup>\*</sup>, (k) H<sub>2</sub>COOH<sup>\*</sup>, (l) HCOH<sup>\*</sup>, (m) HCHO<sup>\*</sup>, (n) CH<sup>\*</sup>, (o) CH<sub>2</sub>OH<sup>\*</sup>, (p) CH<sub>2</sub><sup>\*</sup>, (q) CH<sub>3</sub>OH<sup>\*</sup>, (r) CH<sub>3</sub><sup>\*</sup>, and (s) CH<sub>4</sub><sup>\*</sup>, respectively. The color code of each element is displayed on the bottom.



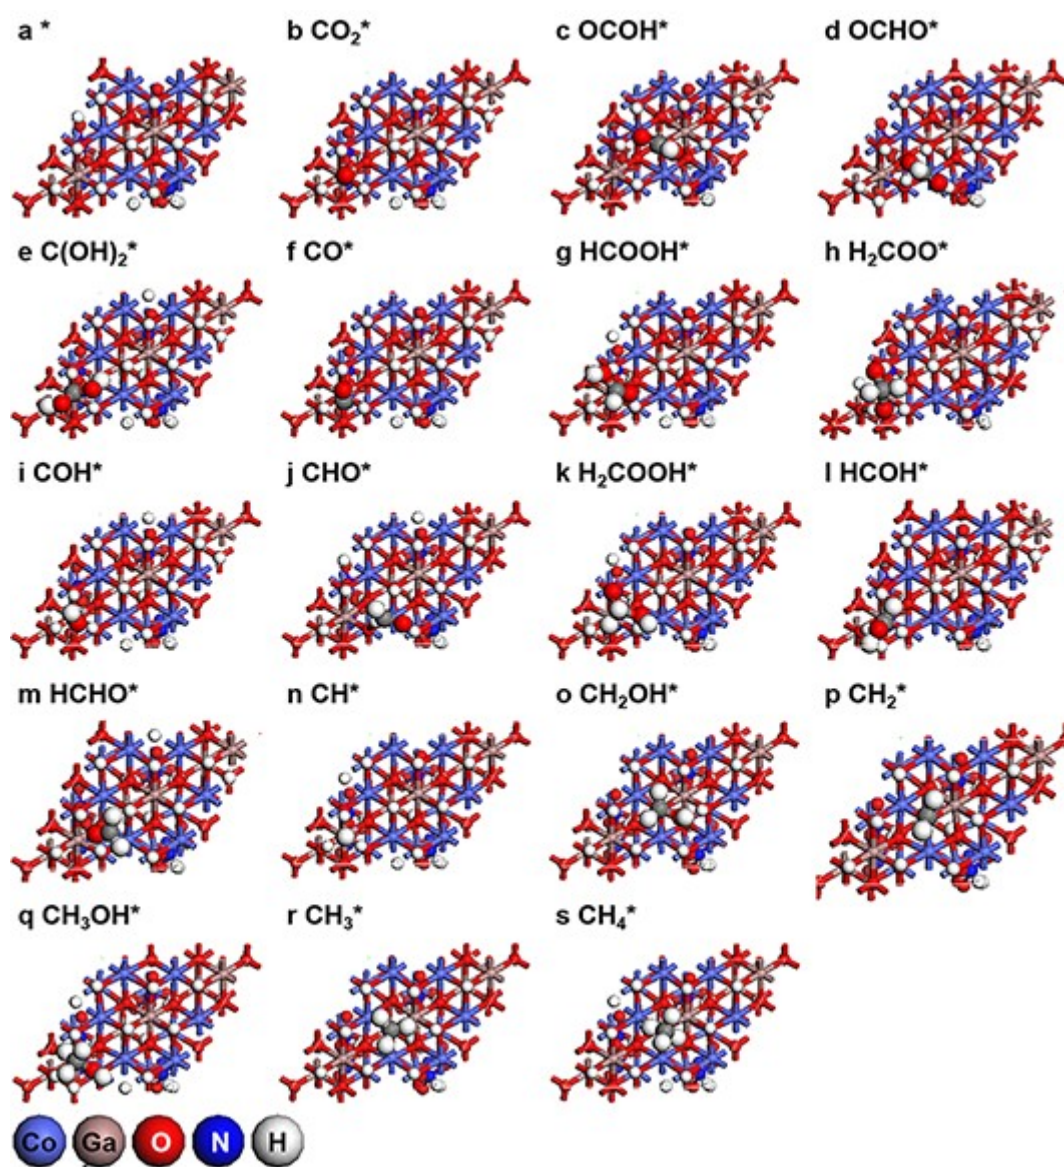

**Fig. S9** Optimized geometries of reaction intermediates during CO<sub>2</sub> reduction over Co<sub>2</sub>Ga-NO<sub>3</sub>-LDH: (a) \*, (b) CO<sub>2</sub>\*, (c) OCOH\*, (d) OCHO\*, (e) C(OH)<sub>2</sub>\*, (f) CO\*, (g) HCOOH\*, (h) H<sub>2</sub>COO\*, (i) COH\*, (j) CHO\*, (k) H<sub>2</sub>COOH\*, (l) HCOH\*, (m) HCHO\*, (n) CH\*, (o) CH<sub>2</sub>OH\*, (p) CH<sub>2</sub>\*, (q) CH<sub>3</sub>OH\*, (r) CH<sub>3</sub>\*, and (s) CH<sub>4</sub>\*, respectively. The color code of each element is displayed on the bottom.

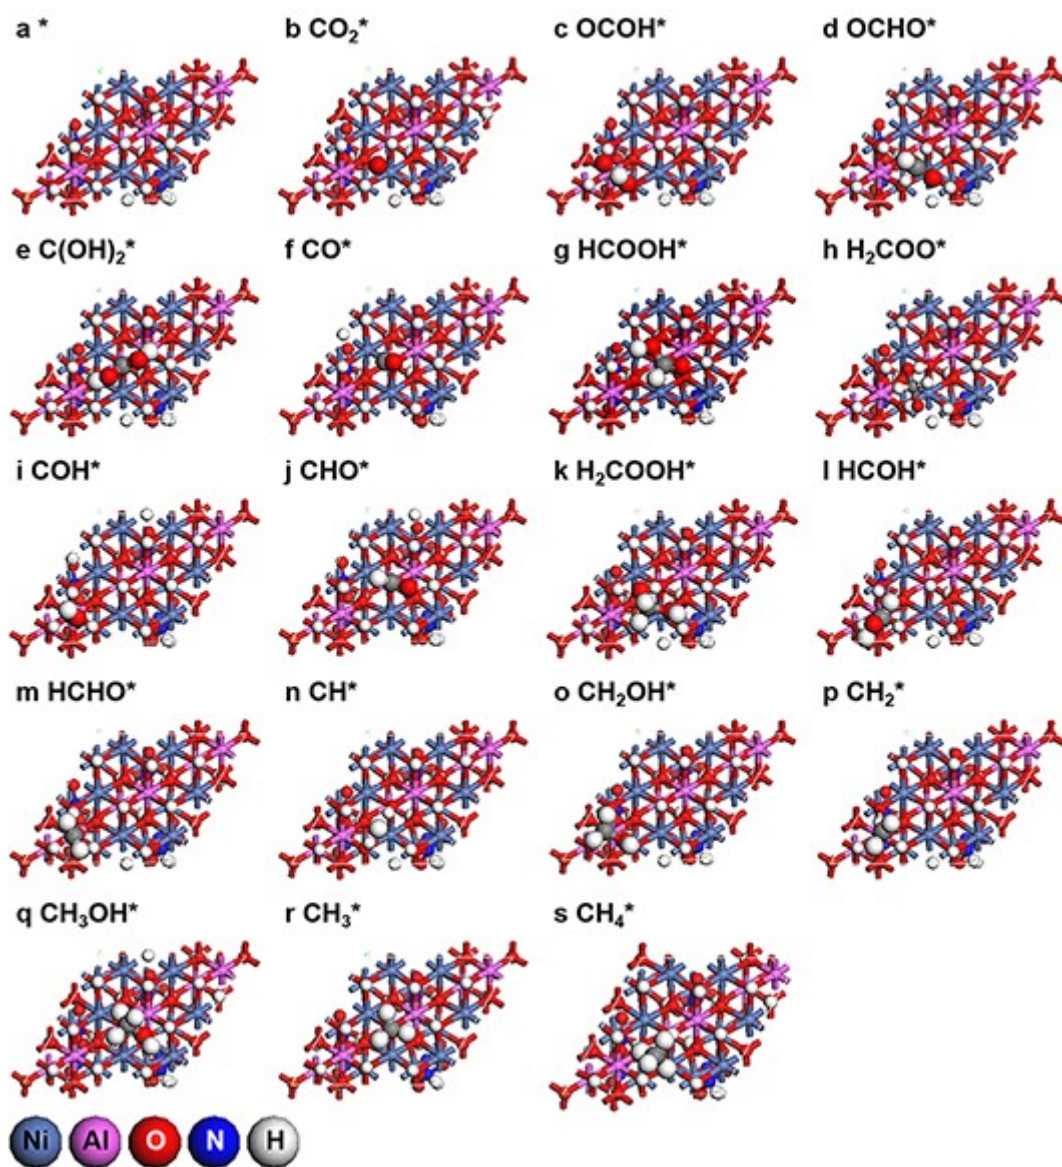

**Fig. S10** Optimized geometries of reaction intermediates during CO<sub>2</sub> reduction over Ni<sub>2</sub>Al-NO<sub>3</sub>-LDH: (a) \*, (b) CO<sub>2</sub>\*, (c) OCOH\*, (d) OCHO\*, (e) C(OH)<sub>2</sub>\*, (f) CO\*, (g) HCOOH\*, (h) H<sub>2</sub>COO\*, (i) COH\*, (j) CHO\*, (k) H<sub>2</sub>COOH\*, (l) HCOH\*, (m) HCHO\*, (n) CH\*, (o) CH<sub>2</sub>OH\*, (p) CH<sub>2</sub>\*, (q) CH<sub>3</sub>OH\*, (r) CH<sub>3</sub>\*, and (s) CH<sub>4</sub>\*, respectively. The color code of each element is displayed on the bottom.

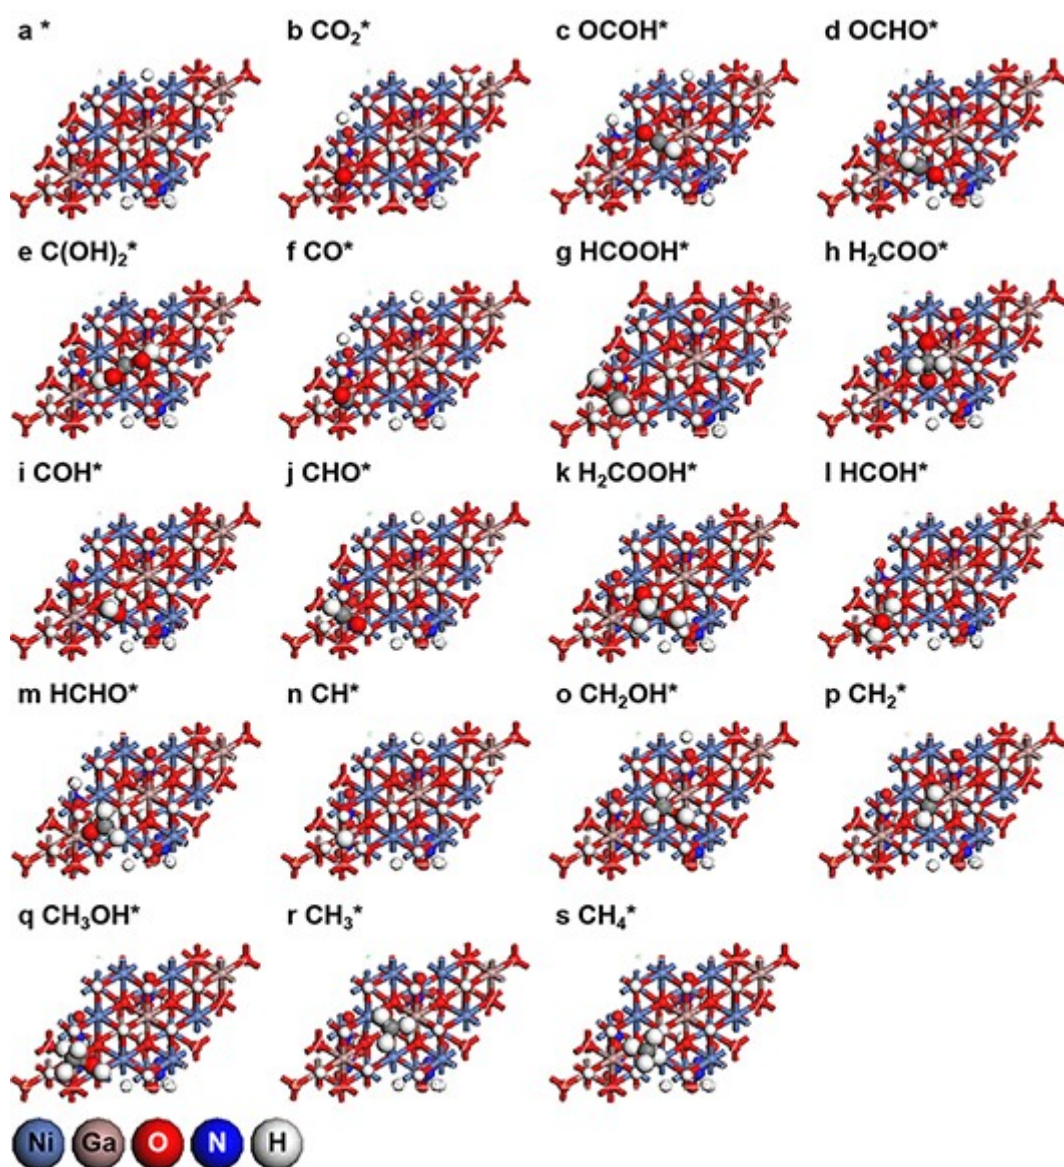

**Fig. S11** Optimized geometries of reaction intermediates during CO<sub>2</sub> reduction over Ni<sub>2</sub>Ga-NO<sub>3</sub>-LDH: (a) \*, (b) CO<sub>2</sub>\*, (c) OCOH\*, (d) OCHO\*, (e) C(OH)<sub>2</sub>\*, (f) CO\*, (g) HCOOH\*, (h) H<sub>2</sub>COO\*, (i) COH\*, (j) CHO\*, (k) H<sub>2</sub>COOH\*, (l) HCOH\*, (m) HCHO\*, (n) CH\*, (o) CH<sub>2</sub>OH\*, (p) CH<sub>2</sub>\*, (q) CH<sub>3</sub>OH\*, (r) CH<sub>3</sub>\*, and (s) CH<sub>4</sub>\*, respectively. The color code of each element is displayed on the bottom.

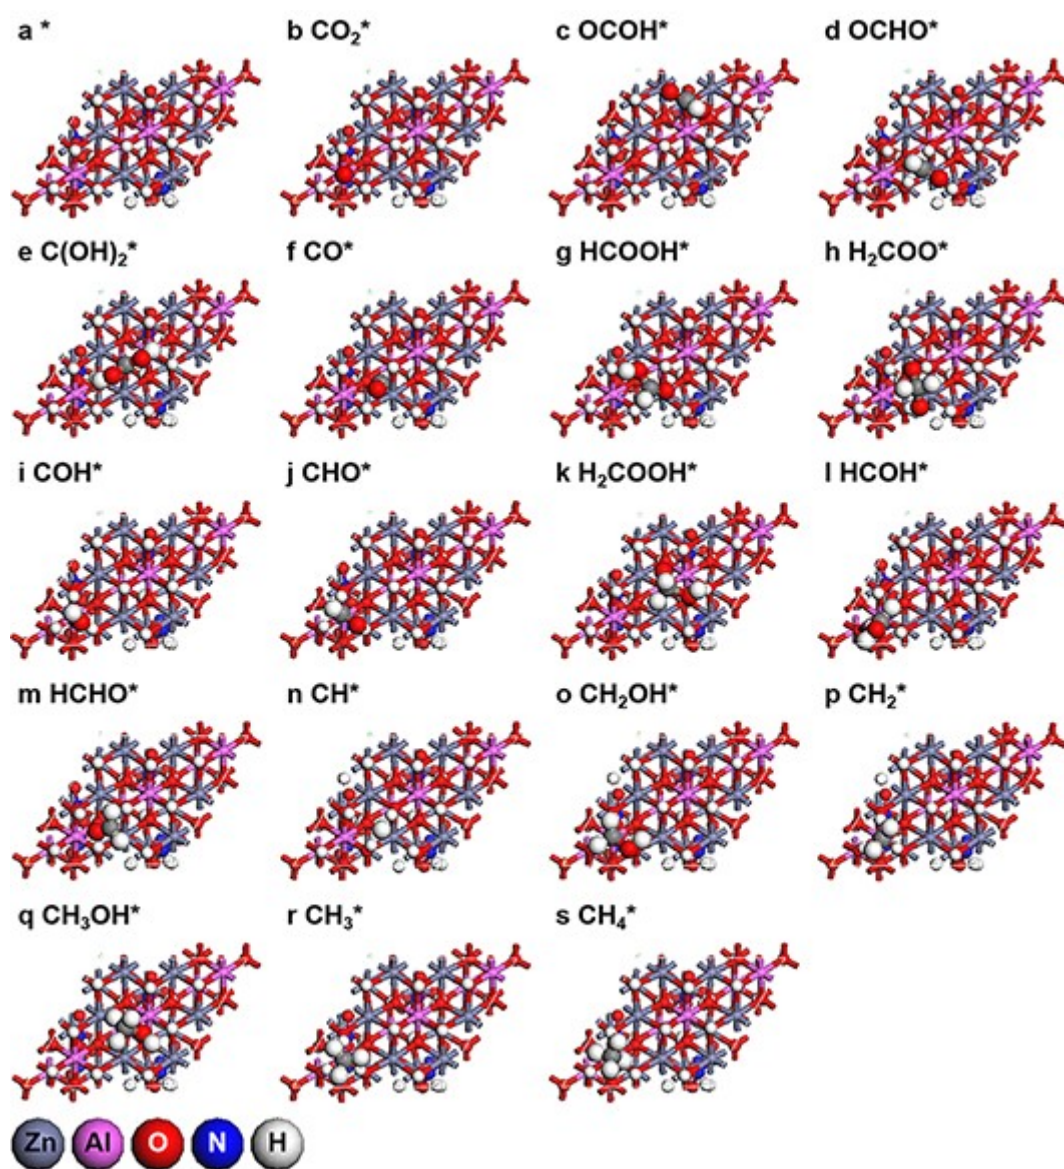

**Fig. S12** Optimized geometries of reaction intermediates during CO<sub>2</sub> reduction over Zn<sub>2</sub>Al-NO<sub>3</sub>-LDH: (a) \*, (b) CO<sub>2</sub>\*, (c) OCOH\*, (d) OCHO\*, (e) C(OH)<sub>2</sub>\*, (f) CO\*, (g) HCOOH\*, (h) H<sub>2</sub>COO\*, (i) COH\*, (j) CHO\*, (k) H<sub>2</sub>COOH\*, (l) HCOH\*, (m) HCHO\*, (n) CH\*, (o) CH<sub>2</sub>OH\*, (p) CH<sub>2</sub>\*, (q) CH<sub>3</sub>OH\*, (r) CH<sub>3</sub>\*, and (s) CH<sub>4</sub>\*, respectively. The color code of each element is displayed on the bottom.

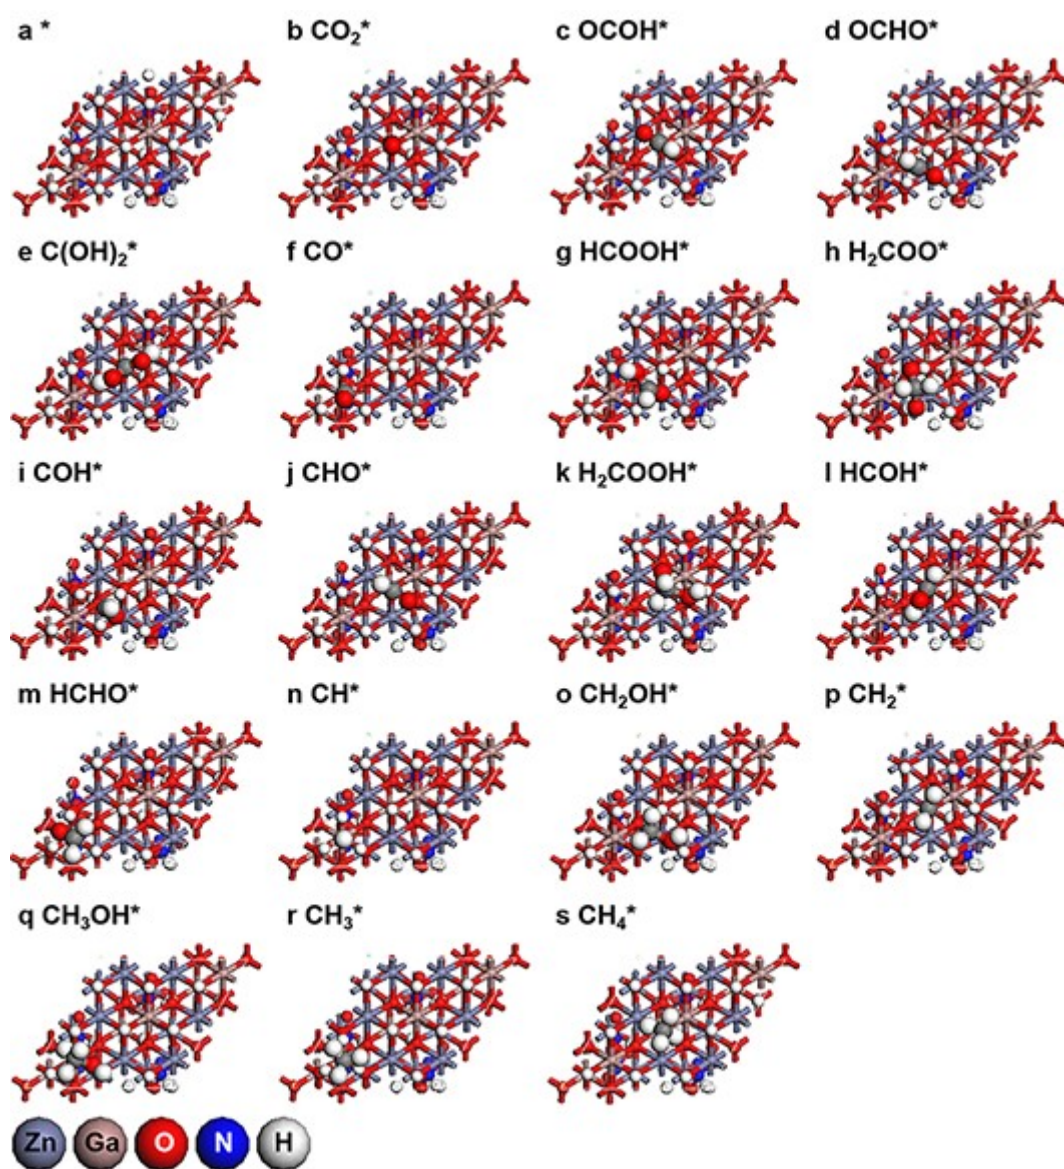

**Fig. S13** Optimized geometries of reaction intermediates during CO<sub>2</sub> reduction over Zn<sub>2</sub>Ga-NO<sub>3</sub>-LDH: (a) \*, (b) CO<sub>2</sub>\*, (c) OCOH\*, (d) OCHO\*, (e) C(OH)<sub>2</sub>\*, (f) CO\*, (g) HCOOH\*, (h) H<sub>2</sub>COO\*, (i) COH\*, (j) CHO\*, (k) H<sub>2</sub>COOH\*, (l) HCOH\*, (m) HCHO\*, (n) CH\*, (o) CH<sub>2</sub>OH\*, (p) CH<sub>2</sub>\*, (q) CH<sub>3</sub>OH\*, (r) CH<sub>3</sub>\*, and (s) CH<sub>4</sub>\*, respectively. The color code of each element is displayed on the bottom.

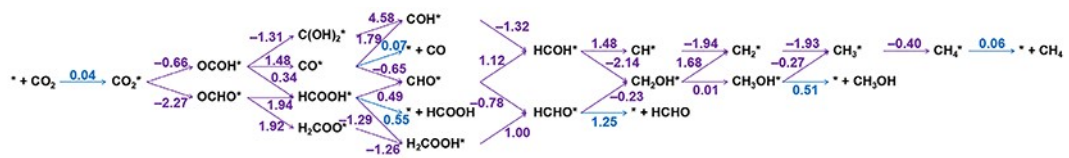

**Fig. S14** Gibbs free energy changes ( $\Delta G$ ) of elementary steps in  $\text{CO}_2$  reduction over  $\text{Mg}_2\text{Ga-NO}_3\text{-LDH}$  in the unit of eV. The condition is pH 0, 298.15 K, 0.1 MPa and without illumination.

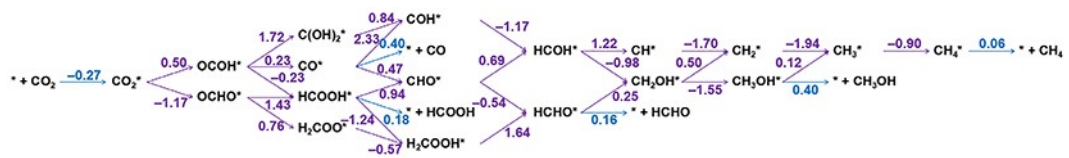

**Fig. S15** Gibbs free energy changes ( $\Delta G$ ) of elementary steps in  $\text{CO}_2$  reduction over  $\text{Co}_2\text{Al-NO}_3\text{-LDH}$  in the unit of eV. The condition is pH 0, 298.15 K, 0.1 MPa and without illumination.





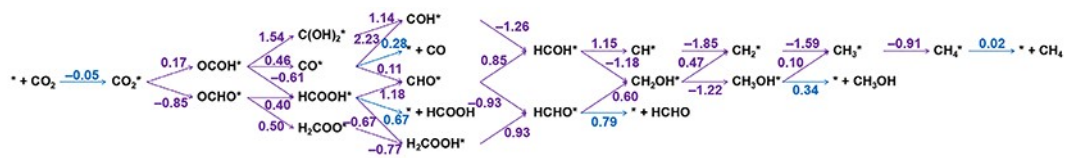

**Fig. S17** Gibbs free energy changes ( $\Delta G$ ) of elementary steps in  $\text{CO}_2$  reduction over  $\text{Ni}_2\text{Al-NO}_3\text{-LDH}$  in the unit of eV. The condition is pH 0, 298.15 K, 0.1 MPa and without illumination.



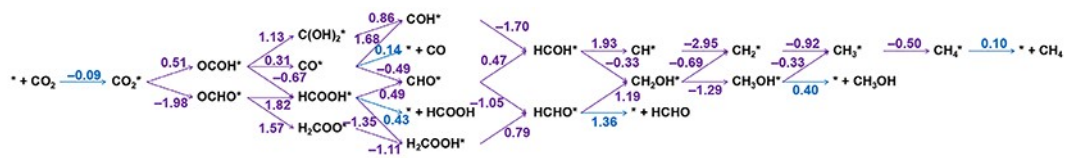

**Fig. S19** Gibbs free energy changes ( $\Delta G$ ) of elementary steps in  $\text{CO}_2$  reduction over  $\text{Zn}_2\text{Al-NO}_3\text{-LDH}$  in the unit of eV. The condition is pH 0, 298.15 K, 0.1 MPa and without illumination.

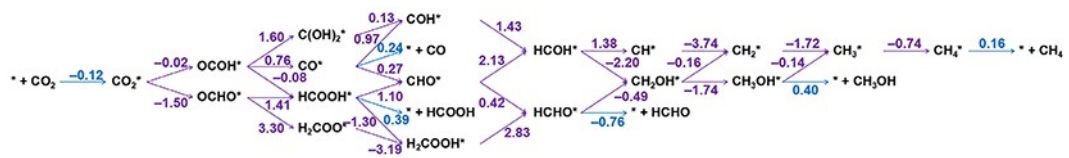

**Fig. S20** Gibbs free energy changes ( $\Delta G$ ) of elementary steps in  $\text{CO}_2$  reduction over  $\text{Zn}_2\text{Ga-NO}_3\text{-LDH}$  in the unit of eV. The condition is pH 0, 298.15 K, 0.1 MPa and without illumination.

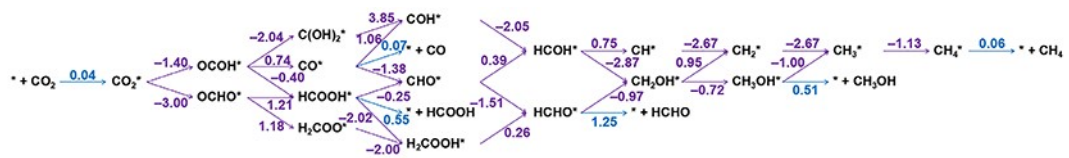

**Fig. S21** Gibbs free energy changes ( $\Delta G$ ) of elementary steps in  $\text{CO}_2$  reduction over  $\text{Mg}_2\text{Ga-NO}_3\text{-LDH}$  in the unit of eV. The condition is pH 7, 298.15 K, 0.1 MPa and with illumination.

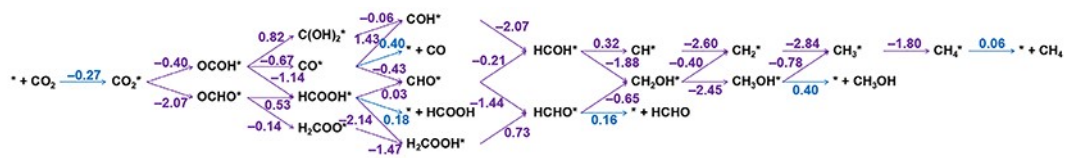

**Fig. S22** Gibbs free energy changes ( $\Delta G$ ) of elementary steps in  $\text{CO}_2$  reduction over  $\text{Co}_2\text{Al-NO}_3\text{-LDH}$  in the unit of eV. The condition is pH 7, 298.15 K, 0.1 MPa and with illumination.

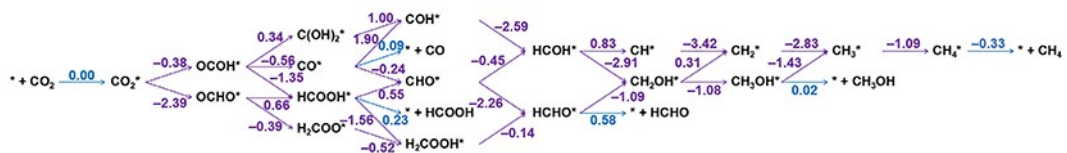

**Fig. S23** Gibbs free energy changes ( $\Delta G$ ) of elementary steps in  $\text{CO}_2$  reduction over  $\text{Co}_2\text{Ga-NO}_3\text{-LDH}$  in the unit of eV. The condition is pH 7, 298.15 K, 0.1 MPa and with illumination.

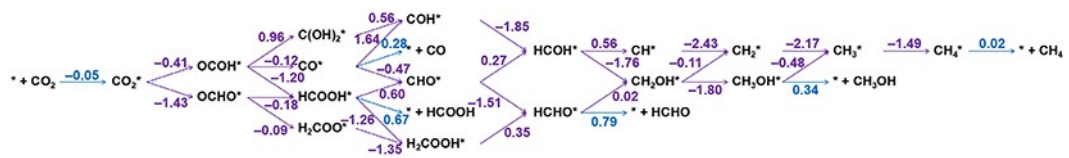

**Fig. S24** Gibbs free energy changes ( $\Delta G$ ) of elementary steps in  $\text{CO}_2$  reduction over  $\text{Ni}_2\text{Al-NO}_3\text{-LDH}$  in the unit of eV. The condition is pH 7, 298.15 K, 0.1 MPa and with illumination.



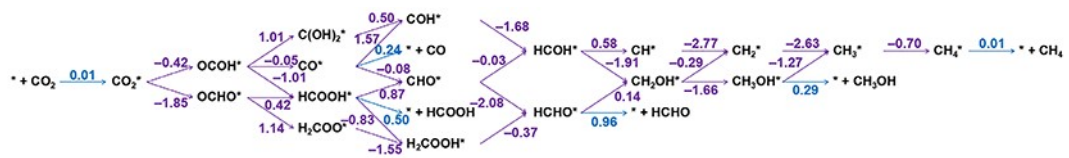

**Fig. S25** Gibbs free energy changes ( $\Delta G$ ) of elementary steps in  $\text{CO}_2$  reduction over  $\text{Ni}_2\text{Ga-NO}_3\text{-LDH}$  in the unit of eV. The condition is pH 7, 298.15 K, 0.1 MPa and with illumination.



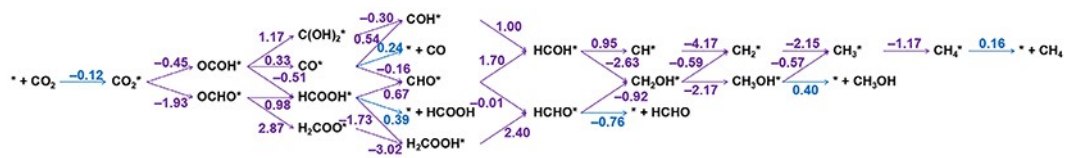

**Fig. S27** Gibbs free energy changes ( $\Delta G$ ) of elementary steps in  $\text{CO}_2$  reduction over  $\text{Zn}_2\text{Ga-NO}_3\text{-LDH}$  in the unit of eV. The condition is pH 7, 298.15 K, 0.1 MPa and with illumination.

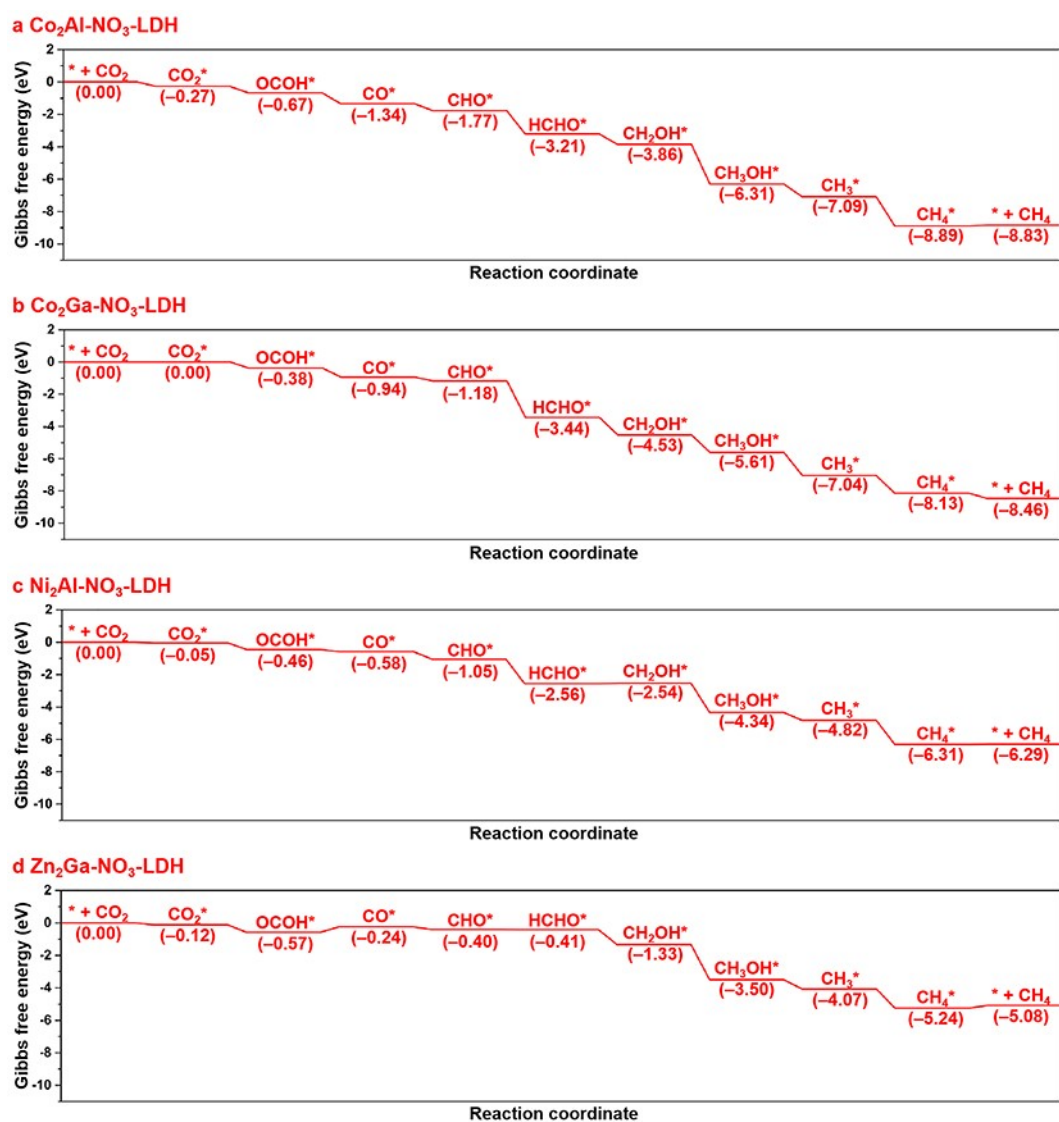

**Fig. S28** Gibbs free energy diagrams of the main reaction pathways for photocatalytic CO<sub>2</sub> reduction over (a) Co<sub>2</sub>Al-NO<sub>3</sub>-LDH, (b) Co<sub>2</sub>Ga-NO<sub>3</sub>-LDH, (c) Ni<sub>2</sub>Al-NO<sub>3</sub>-LDH, and (d) Zn<sub>2</sub>Ga-NO<sub>3</sub>-LDH, respectively.

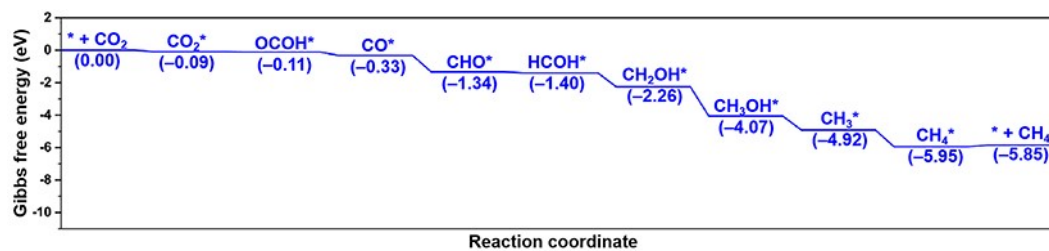

**Fig. S29** Gibbs free energy diagrams of the main reaction pathways for photocatalytic CO<sub>2</sub> reduction over Zn<sub>2</sub>Al-NO<sub>3</sub>-LDH.

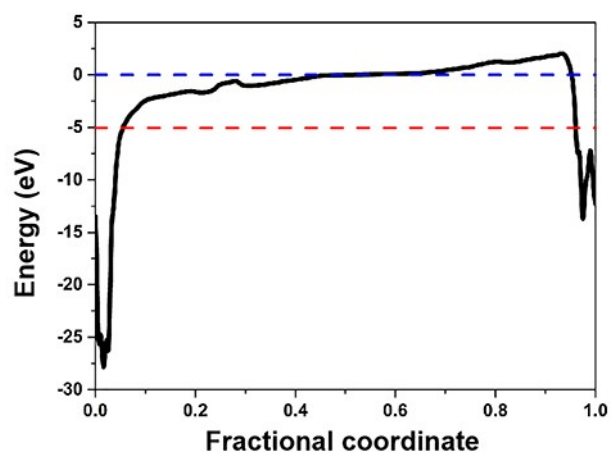

**Fig. S30** Work functions of the (001) surface for  $(\text{ZnCu})_2\text{Ga-NO}_3\text{-LDH}$ . Vacuum level (set as zero point) and Fermi level are labeled with dashed blue line and red line, respectively.

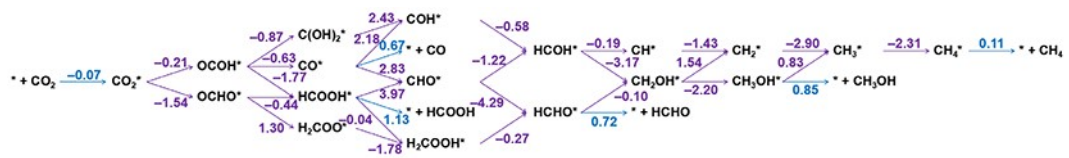

**Fig. S31** Gibbs free energy changes ( $\Delta G$ ) of elementary steps in  $\text{CO}_2$  reduction over  $(\text{ZnCu})_2\text{Ga-NO}_3\text{-LDH}$  in the unit of eV. The condition is pH 7, 298.15 K, 0.1 MPa and with illumination.

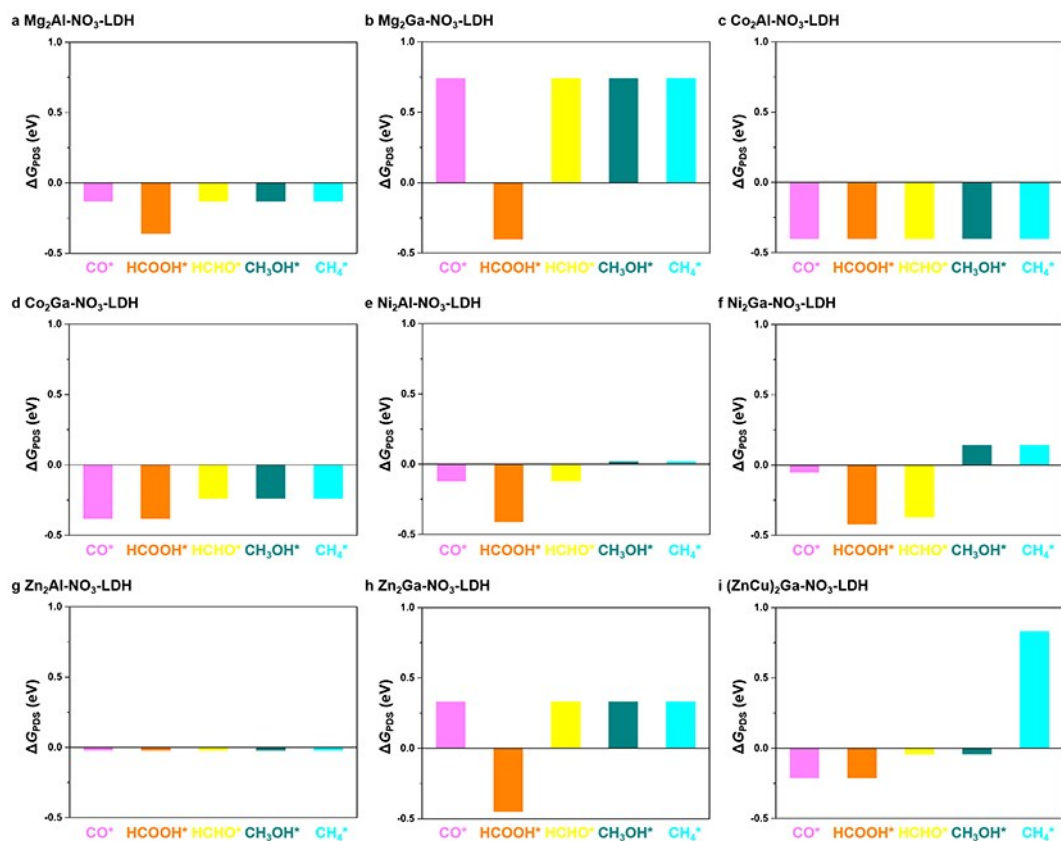

**Fig. S32**  $\Delta G_{PDS}$  for generating  $\text{CO}^*$ ,  $\text{HCOOH}^*$ ,  $\text{HCHO}^*$ ,  $\text{CH}_3\text{OH}^*$ , and  $\text{CH}_4^*$  under reaction condition of (a)  $\text{Mg}_2\text{Al-NO}_3\text{-LDH}$ , (b)  $\text{Mg}_2\text{Ga-NO}_3\text{-LDH}$ , (c)  $\text{Co}_2\text{Al-NO}_3\text{-LDH}$ , (d)  $\text{Co}_2\text{Ga-NO}_3\text{-LDH}$ , (e)  $\text{Ni}_2\text{Al-NO}_3\text{-LDH}$ , (f)  $\text{Ni}_2\text{Ga-NO}_3\text{-LDH}$ , (g)  $\text{Zn}_2\text{Al-NO}_3\text{-LDH}$ , (h)  $\text{Zn}_2\text{Ga-NO}_3\text{-LDH}$ , and (i)  $(\text{ZnCu})_2\text{Ga-NO}_3\text{-LDH}$ .



## Tables

**Table S1** Experimental lattice parameters (*a*, *b*, and *c*) of M<sub>2</sub>M'-NO<sub>3</sub>-LDHs

| Model                                   | Lattice parameter (Å) |                    |                    |            |          |          |
|-----------------------------------------|-----------------------|--------------------|--------------------|------------|----------|----------|
|                                         | Experimental          |                    |                    | Calculated |          |          |
|                                         | <i>a</i>              | <i>b</i>           | <i>c</i>           | <i>a</i>   | <i>b</i> | <i>c</i> |
| Mg <sub>2</sub> Al-NO <sub>3</sub> -LDH | 3.05 <sup>S1</sup>    | 3.05 <sup>S1</sup> | 8.79 <sup>S2</sup> | 3.02       | 3.03     | 8.78     |
| Mg <sub>2</sub> Ga-NO <sub>3</sub> -LDH | 3.09 <sup>S3</sup>    | 3.09 <sup>S3</sup> | 8.79 <sup>S2</sup> | 3.05       | 3.08     | 8.89     |
| Co <sub>2</sub> Al-NO <sub>3</sub> -LDH | 3.09 <sup>S4</sup>    | 3.09 <sup>S4</sup> | 8.79 <sup>S2</sup> | 3.03       | 3.04     | 8.64     |
| Co <sub>2</sub> Ga-NO <sub>3</sub> -LDH | 3.10 <sup>S5</sup>    | 3.10 <sup>S5</sup> | 8.79 <sup>S2</sup> | 3.02       | 3.11     | 8.95     |
| Ni <sub>2</sub> Al-NO <sub>3</sub> -LDH | 3.05 <sup>S1</sup>    | 3.05 <sup>S1</sup> | 8.79 <sup>S2</sup> | 3.00       | 3.03     | 8.87     |
| Ni <sub>2</sub> Ga-NO <sub>3</sub> -LDH | 3.08 <sup>S6</sup>    | 3.08 <sup>S6</sup> | 8.79 <sup>S2</sup> | 3.04       | 3.06     | 8.84     |
| Zn <sub>2</sub> Al-NO <sub>3</sub> -LDH | 3.08 <sup>S1</sup>    | 3.08 <sup>S1</sup> | 8.79 <sup>S2</sup> | 3.05       | 3.06     | 8.87     |
| Zn <sub>2</sub> Ga-NO <sub>3</sub> -LDH | 3.11 <sup>S7</sup>    | 3.11 <sup>S7</sup> | 8.79 <sup>S2</sup> | 3.09       | 3.16     | 8.96     |

**Table S2** Energies of CO<sub>2</sub> reduction intermediates at different adsorption sites of Mg<sub>2</sub>Al-NO<sub>3</sub>-LDH

| Model                | Energy (eV)      |             |                  |
|----------------------|------------------|-------------|------------------|
|                      | top              | bridge      | fcc              |
| CO <sub>2</sub> *    | -38890.4470      | -38890.4065 | -38890.4337      |
| OCOH*                | -38906.8336      | -38906.7778 | -38906.6231      |
| OCHO*                | -38907.8194      | -38908.1452 | -38907.8902      |
| C(OH) <sub>2</sub> * | -38920.7460      | -38920.5563 | -38920.7002      |
| CO*                  | -38452.3374      | -38452.3221 | -38452.3511      |
| HCOOH*               | -38922.5737      | -38922.5089 | -38922.5183      |
| H <sub>2</sub> COO*  | -38922.3121      | -38922.7157 | -38922.6347      |
| COH*                 | -38466.5764      | -38466.6712 | -38466.6790      |
| CHO*                 | -38469.5116      | -38469.7583 | -38468.9898      |
| H <sub>2</sub> COOH* | -38939.8432      | -38940.0609 | -38939.6962      |
| HCOH*                | not<br>converged | -38483.2064 | not<br>converged |
| HCHO*                | -38485.5958      | -38485.8926 | -38485.8374      |
| CH*                  | -38029.2951      | -38029.5589 | -38029.9054      |
| CH <sub>2</sub> OH*  | -38502.1801      | -38502.3360 | -38502.3265      |
| CH <sub>2</sub> *    | -38047.7712      | -38046.9968 | -38047.5121      |
| CH <sub>3</sub> OH*  | -38518.2744      | -38518.1256 | -38518.2171      |
| CH <sub>3</sub> *    | -38075.0703      | -38075.2739 | -38065.3595      |
| CH <sub>4</sub> *    | -38082.1982      | -38082.0234 | -38081.9772      |

**Table S3** Energies of CO<sub>2</sub> reduction intermediates at different adsorption sites of Mg<sub>2</sub>Ga-NO<sub>3</sub>-LDH

| Model                | Energy (eV)      |                  |                  |
|----------------------|------------------|------------------|------------------|
|                      | top              | bridge           | fcc              |
| CO <sub>2</sub> *    | -50856.4136      | -50856.3946      | -50856.3947      |
| OCOH*                | not<br>converged | -50872.6165      | not<br>converged |
| OCHO*                | -50873.9967      | -50873.9400      | -50873.7769      |
| C(OH) <sub>2</sub> * | -50886.8090      | -50886.6332      | -50886.7194      |
| CO*                  | -50418.2934      | -50418.2996      | -50418.2924      |
| HCOOH*               | -50888.6118      | -50888.6084      | -50888.5967      |
| H <sub>2</sub> COO*  | -50888.6052      | -50888.6424      | -50888.5583      |
| COH*                 | -50432.4616      | -50432.5101      | -50432.4665      |
| CHO*                 | -50435.3198      | -50435.6443      | -50434.8036      |
| H <sub>2</sub> COOH* | -50905.8388      | -50905.7392      | -50905.7133      |
| HCOH*                | not<br>converged | not<br>converged | not<br>converged |
| HCHO*                | -50451.7151      | -50451.5607      | -50451.7551      |
| CH*                  | -49995.6147      | -49995.6902      | -49995.7483      |
| CH <sub>2</sub> OH*  | -50468.1680      | -50468.3246      | -50468.3129      |
| CH <sub>2</sub> *    | -50013.6855      | -50013.3585      | -50014.1222      |
| CH <sub>3</sub> OH*  | -50484.3761      | -50484.2608      | -50484.3233      |
| CH <sub>3</sub> *    | -50031.9517      | -50032.0284      | -50031.2464      |
| CH <sub>4</sub> *    | -50048.0124      | -50048.0117      | -50047.9975      |

**Table S4** Energies of CO<sub>2</sub> reduction intermediates at different adsorption sites of Co<sub>2</sub>Al-NO<sub>3</sub>-LDH

| Model                | Energy (eV) |             |             |
|----------------------|-------------|-------------|-------------|
|                      | top         | bridge      | fcc         |
| CO <sub>2</sub> *    | -39665.2331 | -39665.2346 | -39665.2115 |
| OCOH*                | -39681.0485 | -39681.2242 | -39680.9187 |
| OCHO*                | -39682.2021 | -39682.3024 | -39681.9680 |
| C(OH) <sub>2</sub> * | -39695.3455 | -39695.0108 | -39695.3781 |
| CO*                  | -39227.3984 | -39227.4028 | -39227.4084 |
| HCOOH*               | -39697.2282 | -39696.8880 | -39697.3786 |
| H <sub>2</sub> COO*  | -39697.2475 | -39697.7925 | -39697.6048 |
| COH*                 | -39240.7676 | -39241.1512 | -39241.1716 |
| CHO*                 | -39243.6052 | -39242.8935 | -39242.8536 |
| H <sub>2</sub> COOH* | -39713.8353 | -39714.1663 | -39713.7418 |
| HCOH*                | -39258.0983 | -39258.3035 | -39257.9790 |
| HCHO*                | -39260.0983 | -39260.0104 | -39259.9918 |
| CH*                  | -38803.4617 | -38805.5095 | -38804.0903 |
| CH <sub>2</sub> OH*  | -39276.5555 | -39275.1963 | -39276.7322 |
| CH <sub>2</sub> *    | -38822.3026 | -38822.2657 | -38821.8709 |
| CH <sub>3</sub> OH*  | -39293.0070 | -39292.6451 | -39292.8131 |
| CH <sub>3</sub> *    | -38840.3498 | -38840.2521 | -38840.5143 |
| CH <sub>4</sub> *    | -38856.3248 | -38856.8700 | -38856.9296 |

**Table S5** Energies of CO<sub>2</sub> reduction intermediates at different adsorption sites of Co<sub>2</sub>Ga-NO<sub>3</sub>-LDH

| Model                | Energy (eV)      |                  |                  |
|----------------------|------------------|------------------|------------------|
|                      | top              | bridge           | fcc              |
| CO <sub>2</sub> *    | -51623.3559      | -51623.4618      | -51623.5148      |
| OCOH*                | -51637.5067      | not<br>converged | -51637.4081      |
| OCHO*                | -51640.2971      | -51640.4484      | -51640.1589      |
| C(OH) <sub>2</sub> * | -51653.6100      | -51653.5089      | -51653.6932      |
| CO*                  | -51185.6303      | -51185.6648      | -51185.6787      |
| HCOOH*               | -51655.2584      | -51655.3190      | -51655.4344      |
| H <sub>2</sub> COO*  | -51655.9113      | -51656.2597      | -51656.3503      |
| COH*                 | -51199.3545      | -51199.4746      | -51199.5358      |
| CHO*                 | not<br>converged | -51201.2261      | -51201.1690      |
| H <sub>2</sub> COOH* | not<br>converged | -51671.4452      | -51671.4582      |
| HCOH*                | -51216.2032      | not<br>converged | -51216.5382      |
| HCHO*                | -51218.1285      | -51218.4588      | -51218.2720      |
| CH*                  | -50762.2258      | not<br>converged | -50762.4936      |
| CH <sub>2</sub> OH*  | -51234.7252      | not<br>converged | not<br>converged |
| CH <sub>2</sub> *    | -50780.4599      | not<br>converged | not<br>converged |
| CH <sub>3</sub> OH*  | -51251.0075      | -51250.8517      | -51251.0616      |
| CH <sub>3</sub> *    | -50798.7906      | not<br>converged | not<br>converged |
| CH <sub>4</sub> *    | -50815.1904      | -50815.1148      | -50815.1889      |

**Table S6** Energies of CO<sub>2</sub> reduction intermediates at different adsorption sites of Ni<sub>2</sub>Al-NO<sub>3</sub>-LDH

| Model                | Energy (eV) |             |             |
|----------------------|-------------|-------------|-------------|
|                      | top         | bridge      | fcc         |
| CO <sub>2</sub> *    | -43402.0431 | -43402.0910 | -43402.0484 |
| OCOH*                | -43418.4476 | -43418.1125 | -43417.7205 |
| OCHO*                | -43419.2565 | -43419.3552 | -43418.6013 |
| C(OH) <sub>2</sub> * | -43432.2258 | -43432.1417 | -43432.1411 |
| CO*                  | -42964.2702 | -42963.9394 | -42964.1894 |
| HCOOH*               | -43434.3967 | -43433.5941 | -43433.5526 |
| H <sub>2</sub> COO*  | -43433.6592 | -43434.7847 | -43434.5032 |
| COH*                 | -42977.9547 | -42978.1322 | -42978.1743 |
| CHO*                 | -42980.0729 | -42979.8740 | -42979.7848 |
| H <sub>2</sub> COOH* | -43450.5228 | -43451.0619 | -43451.0378 |
| HCOH*                | -42996.0821 | -42994.9525 | -42995.2125 |
| HCHO*                | -42996.8548 | -42997.1137 | -42997.1672 |
| CH*                  | -42541.0676 | -42541.1864 | -42541.1504 |
| CH <sub>2</sub> OH*  | -43014.0009 | -43013.9833 | -43012.8998 |
| CH <sub>2</sub> *    | -42558.5712 | -42559.3718 | -42559.6508 |
| CH <sub>3</sub> OH*  | -43029.8385 | -43029.7277 | -43029.5852 |
| CH <sub>3</sub> *    | -42577.2406 | -42577.8595 | -42576.2270 |
| CH <sub>4</sub> *    | -42593.6306 | -42593.7421 | -42593.6349 |

**Table S7** Energies of CO<sub>2</sub> reduction intermediates at different adsorption sites of Ni<sub>2</sub>Ga-NO<sub>3</sub>-LDH

| Model                | Energy (eV) |             |             |
|----------------------|-------------|-------------|-------------|
|                      | top         | bridge      | fcc         |
| CO <sub>2</sub> *    | -55359.9083 | -55359.9504 | -55359.9844 |
| OCOH*                | -55375.7676 | -55376.5728 | -55375.7600 |
| OCHO*                | -55376.6125 | -55377.1770 | -55376.6532 |
| C(OH) <sub>2</sub> * | -55390.1782 | -55390.0319 | -55390.1473 |
| CO*                  | -54922.2316 | -54922.2252 | -54922.2470 |
| HCOOH*               | -55392.0768 | -55391.9602 | -55392.1973 |
| H <sub>2</sub> COO*  | -55391.4731 | -55392.7151 | -55392.5573 |
| COH*                 | -54935.9457 | -54936.0885 | -54935.7257 |
| CHO*                 | -54939.0971 | -54937.9025 | -54937.9056 |
| H <sub>2</sub> COOH* | -55408.5235 | -55408.8834 | -55408.3682 |
| HCOH*                | -54953.8964 | -54953.1540 | -54952.8040 |
| HCHO*                | -54954.8848 | -54955.2799 | -54954.9641 |
| CH*                  | -54499.0152 | -54498.5798 | -54499.0268 |
| CH <sub>2</sub> OH*  | -54971.4913 | -54971.9063 | -54970.9757 |
| CH <sub>2</sub> *    | -54517.0844 | -54516.9653 | -54516.8616 |
| CH <sub>3</sub> OH*  | -54987.7009 | -54987.6612 | -54987.7425 |
| CH <sub>3</sub> *    | -54535.2775 | -54533.7893 | -54534.5304 |
| CH <sub>4</sub> *    | -54551.5870 | -54551.5907 | -54551.2964 |

**Table S8** Energies of CO<sub>2</sub> reduction intermediates at different adsorption sites of Zn<sub>2</sub>Al-NO<sub>3</sub>-LDH

| Model                | Energy (eV)      |                  |                  |
|----------------------|------------------|------------------|------------------|
|                      | top              | bridge           | fcc              |
| CO <sub>2</sub> *    | -47686.2190      | -47686.2425      | -47686.2437      |
| OCOH*                | not<br>converged | -47702.5056      | not<br>converged |
| OCHO*                | -47703.5521      | -47703.9425      | -47703.5039      |
| C(OH) <sub>2</sub> * | -47716.5446      | -47716.2900      | -47716.4278      |
| CO*                  | -47248.2149      | -47248.2222      | -47248.1564      |
| HCOOH*               | -47718.1824      | -47718.2452      | -47718.1887      |
| H <sub>2</sub> COO*  | -47718.0436      | -47718.2667      | -47718.1942      |
| COH*                 | -47262.0017      | -47263.3856      | -47262.4154      |
| CHO*                 | -47265.5138      | -47265.2938      | -47264.4538      |
| H <sub>2</sub> COOH* | -47735.5253      | -47735.4087      | -47735.3934      |
| HCOH*                | -47280.3553      | -47280.5120      | -47280.5435      |
| HCHO*                | -47281.0395      | -47281.3845      | -47281.2813      |
| CH*                  | -46825.2912      | -46825.5819      | -46825.2204      |
| CH <sub>2</sub> OH*  | -47298.1772      | not<br>converged | -47296.6436      |
| CH <sub>2</sub> *    | -46844.0468      | -46844.1175      | -46843.2050      |
| CH <sub>3</sub> OH*  | -47314.0408      | -47313.9965      | -47314.0177      |
| CH <sub>3</sub> *    | -46862.2165      | -46862.2994      | -46861.0456      |
| CH <sub>4</sub> *    | -46877.8833      | -46877.8737      | -46877.8894      |



**Table S9** Energies of CO<sub>2</sub> reduction intermediates at different adsorption sites of Zn<sub>2</sub>Ga-NO<sub>3</sub>-LDH

| Model                | Energy (eV) |             |             |
|----------------------|-------------|-------------|-------------|
|                      | top         | bridge      | fcc         |
| CO <sub>2</sub> *    | -59645.1861 | -59645.1591 | -59645.1753 |
| OCOH*                | -59661.3859 | -59661.2080 | -59661.8666 |
| OCHO*                | -59662.1733 | -59662.4024 | -59662.3075 |
| C(OH) <sub>2</sub> * | -59675.4283 | -59675.1398 | -59675.3143 |
| CO*                  | -59207.1197 | -59207.1177 | -59207.1572 |
| HCOOH*               | -59677.0530 | -59677.2541 | -59677.2522 |
| H <sub>2</sub> COO*  | -59676.4597 | -59676.9687 | -59676.9465 |
| COH*                 | -59220.8625 | -59221.3697 | -59221.3059 |
| CHO*                 | -59223.0579 | -59223.7235 | -59223.4380 |
| H <sub>2</sub> COOH* | -59694.3044 | -59694.1274 | -59694.1259 |
| HCOH*                | -59237.7284 | -59237.6510 | -59237.7072 |
| HCHO*                | -59239.8865 | -59240.2714 | -59240.3621 |
| CH*                  | -58783.9194 | -58783.4883 | -58784.0027 |
| CH <sub>2</sub> OH*  | -59256.7859 | -59257.2328 | -59257.2052 |
| CH <sub>2</sub> *    | -58802.4767 | -58802.3483 | -58801.2728 |
| CH <sub>3</sub> OH*  | -59272.9040 | -59272.8795 | -59272.9678 |
| CH <sub>3</sub> *    | -58820.5245 | -58819.2209 | -58819.8327 |
| CH <sub>4</sub> *    | -58836.8482 | -58836.8471 | -58836.8229 |

**Table S10** Energies of CO<sub>2</sub> reduction intermediates at different adsorption sites of (ZnCu)<sub>2</sub>Ga-NO<sub>3</sub>-LDH

| Model                | Energy (eV)      |                  |                  |
|----------------------|------------------|------------------|------------------|
|                      | top              | bridge           | fcc              |
| CO <sub>2</sub> *    | -59417.6124      | -59417.6372      | -59417.6800      |
| OCOH*                | not<br>converged | not<br>converged | -59433.8462      |
| OCHO*                | -59434.4482      | -59434.6726      | -59434.6151      |
| C(OH) <sub>2</sub> * | -59447.9759      | -59448.6177      | -59449.6726      |
| CO*                  | not<br>converged | -58980.3462      | -58979.8378      |
| HCOOH*               | -59449.7771      | -59450.5387      | -59449.8168      |
| H <sub>2</sub> COO*  | -59448.7444      | -59449.2893      | -59449.2030      |
| COH*                 | -58993.6017      | -58993.6996      | -58993.6573      |
| CHO*                 | -58996.5901      | -58995.3117      | -58995.2977      |
| H <sub>2</sub> COOH* | -59466.3900      | -59466.3943      | not<br>converged |
| HCOH*                | not<br>converged | -59010.7624      | not<br>converged |
| HCHO*                | -59012.6075      | -59012.7731      | -59012.6765      |
| CH*                  | not<br>converged | -58556.6257      | -58556.4829      |
| CH <sub>2</sub> OH*  | -59029.1222      | -59029.2785      | not<br>converged |
| CH <sub>2</sub> *    | -58574.2100      | -58574.5565      | -58574.2071      |
| CH <sub>3</sub> OH*  | -59046.0342      | -59045.3992      | -59045.4965      |
| CH <sub>3</sub> *    | not<br>converged | -58591.4990      | -58593.2393      |
| CH <sub>4</sub> *    | -58609.2886      | -58609.3307      | -58609.3577      |

## References

- S1 A. Dias, L. Cunha and A. C. Vieira, Synthesis and properties of  $A_6B_2(OH)_{16}Cl_2 \cdot 4H_2O$  (A = Mg, Ni, Zn, Co, Mn and B = Al, Fe) materials for environmental applications, *Mater. Res. Bull.*, 2011, **46**, 1346–1351.
- S2 F. Cavani, F. Trifiro and A. Vaccari, Hydrotalcite-type anionic clays: preparation, properties and applications, *Catal. Today*, 1991, **11**, 173–301.
- S3 U. Unal, Short-time hydrothermal synthesis and delamination of ion exchangeable Mg/Ga layered double hydroxides, *J. Sol. State Chem.*, 2007, **180**, 2525–2533.
- S4 Z.-P. Liu, R.-Z. Ma, M. Osada, N. Iyi, Y. Ebina, K. Takada and T. Sasaki, Synthesis, anion exchange, and delamination of Co-Al layered double hydroxide: assembly of the exfoliated nanosheet/polyanion composite films and magneto-optical studies, *J. Am. Chem. Soc.*, 2006, **128**, 4872–4880.
- S5 X. Chen, H. Chai, Y. Cao, W. Zhou, Y. Li and Y. Yang, Hierarchical CoGa layered double hydroxides grown on nickel foam as high energy density hybrid supercapacitor, *Chem. Eng. J.*, 2020, **381**, 122620.
- S6 A. Alvarez, R. Trujillano and V. Rives, Differently aged gallium-containing layered double hydroxides, *Appl. Clay Sci.*, 2013, **80–81**, 326–333.
- S7 G. S. Thomas and P. V. Kamath, The layered double hydroxide (LDH) of Zn with Ga: synthesis and reversible thermal behaviour, *Solid State Sci.*, 2006, **8**, 1181–1186.
